# Supplementary material for: Re-examination of two diatom reference genomes using long-read sequencing
Source: PubMed Central journal article supplement (PMC8147415; doi:10.1186/s12864-021-07666-3), 2021-05-24
Supplement: 12864_2021_7666_MOESM1_ESM.pdf [file 12864_2021_7666_MOESM1_ESM.pdf]

Supplementary Information for:

Re-examination of two diatom reference genomes using long-read sequencing

Gina V. Filloramo<sup>1,2\*</sup>, Bruce A. Curtis<sup>1,2</sup>, Emma Blanche<sup>1,2</sup> & John M. Archibald<sup>1,2\*</sup>

<sup>1</sup> Department of Biochemistry and Molecular Biology, Dalhousie University, Sir Charles Tupper Medical Building, 5850 College Street, PO Box 15000, Halifax, Nova Scotia, Canada B3H 4R2

<sup>2</sup> Centre for Comparative Genomics and Evolutionary Bioinformatics, Dalhousie University, Halifax, Nova Scotia, Canada

\* To whom correspondence should be addressed: [john.archibald@dal.ca](mailto:john.archibald@dal.ca); [gina.filloramo@dal.ca](mailto:gina.filloramo@dal.ca)

Supplementary File 1. Case studies assessing if the 155 contigs that were too small for inclusion in the *Phaeodactylum tricornutum* Bionano-Canu hybrid assembly could be used to manually complete partially resolved haplotypes and close gap regions inserted into the Bionano-Canu super-scaffolds.

BOWLER ET AL 2008 reference CHR3 (1,460,046 bp)

HAPLOTYPY 1: Super-Scaffold\_100010 → telomere to telomere

- 1,772,416 bp (length supported by PFGE)

|        |         |                                                           |
|--------|---------|-----------------------------------------------------------|
| 1      | 408336  | Consensus_Consensus_tig00002792_subseq_896526:1304861 (-) |
| 408337 | 408349  | GAP 13                                                    |
| 408350 | 1772416 | tig00000092 (+)                                           |

- Includes 2 canu contigs

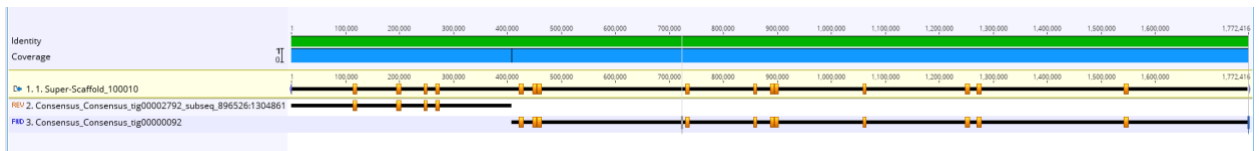

HAPLOTYPY 2: Super-Scaffold\_100012 → no telomeres resolved

- 1,012,550 bp

- Includes 3 canu contigs

|        |         |                                     |
|--------|---------|-------------------------------------|
| 1      | 158602  | Consensus_Consensus_tig00000102 (-) |
| 158603 | 203941  | GAP 45,339 <sup>1</sup>             |
| 203942 | 290375  | Consensus_Consensus_tig00000097 (+) |
| 290376 | 904404  | GAP 614,029 <sup>2</sup>            |
| 904405 | 1012550 | Consensus_Consensus_tig00000096 (+) |

\*\*\*Note that SS\_100012 is syntenic to the following regions of BOWLER ET AL 2008 reference chromosome 3: ~382711-531073; 571269-651974; 1220821-1322320. So SS\_100012 is lacking homology to chr3: 1-380 kb and chr3: 137-1400 kb. A number of unscaffolded contigs were identified with blastn as homologous to reference chr3 to fill in the missing portions at the start and end of SS\_100012.

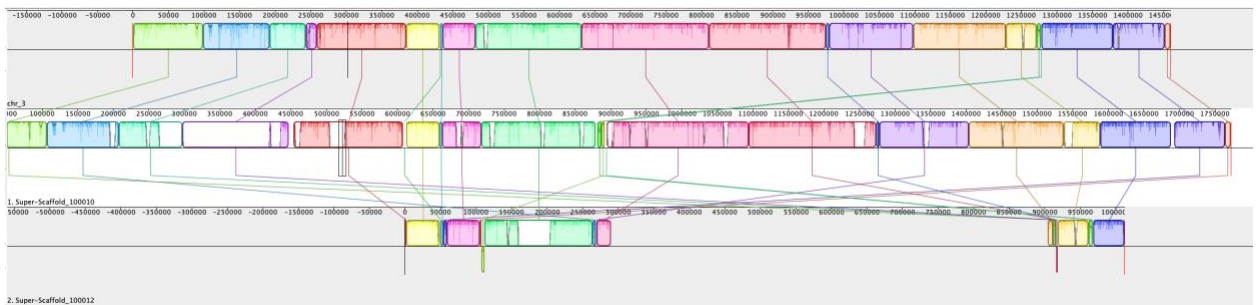

The following five unscaffolded contigs extend the 5P end of SS\_100012

Consensus\_tig00000105 (91,048 bp) overlaps with the 5P end of SS100012 and extends the length of the scaffold 66,879 bp

| S1          | S1 start | S1 stop | S2        | S2 start | S2 stop |
|-------------|----------|---------|-----------|----------|---------|
| tig00000105 | 24169    | 2       | SS_100012 | 2        | 24154   |

| S1          | S1 start | S1 stop | S2   | S2 start | S2 stop |
|-------------|----------|---------|------|----------|---------|
| tig00000105 | 91046    | 3       | chr3 | 328502   | 406926  |

Consensus\_tig00000103 (60,096 bp)

| S1          | S1 start | S1 stop | S2          | S2 start | S2 stop |
|-------------|----------|---------|-------------|----------|---------|
| tig00000103 | 41766    | 60093   | tig00000106 | 103430   | 85080   |

| S1          | S1 start | S1 stop | S2   | S2 start | S2 stop |
|-------------|----------|---------|------|----------|---------|
| tig00000103 | 1        | 60096   | chr3 | 326384   | 266242  |

Consensus\_tig00000106 (103,432 bp)

| S1          | S1 start | S1 stop | S2   | S2 start | S2 stop |
|-------------|----------|---------|------|----------|---------|
| tig00000106 | 1        | 103432  | chr3 | 188337   | 284603  |

| S1          | S1 start | S1 stop | S2          | S2 start | S2 stop |
|-------------|----------|---------|-------------|----------|---------|
| tig00000106 | 103430   | 85080   | tig00000103 | 41766    | 60093   |

Consensus\_tig00000100 (168,241 bp)

| S1          | S1 start | S1 stop | S2   | S2 start | S2 stop |
|-------------|----------|---------|------|----------|---------|
| tig00000100 | 31693    | 168241  | chr3 | 10366    | 131085  |

Consensus\_tig00002793 (69,984 bp)

| S1          | S1 start | S1 stop | S2   | S2 start | S2 stop |
|-------------|----------|---------|------|----------|---------|
| tig00002793 | 1        | 67085   | chr3 | 63251    | 1084    |

The following single unscaffolded contig extends the 3P end of SS100012

Consensus\_tig00000111(121,339bp)

| S1          | S1 start | S1 stop | S2   | S2 start | S2 stop |
|-------------|----------|---------|------|----------|---------|
| tig00000111 | 1        | 119556  | chr3 | 1351081  | 1457872 |

<sup>1</sup> GAP is not resolved by unscaffolded contigs.

<sup>2</sup> GAP is resolved by Consensus\_tig00000094, Consensus\_tig0000099, Consensus\_tig00000143.

Consensus\_tig00000094 (70,965 bp) overlaps with the portion of SS\_100012 that is located immediately upstream from the 5P end of the gap.

| S1         | S1 start | S1 stop | S2        | S2 start | S2 stop |
|------------|----------|---------|-----------|----------|---------|
| tig0000094 | 70963    | 65622   | SS_100012 | 285029   | 290375  |

| S1         | S1 start | S1 stop | S2   | S2 start | S2 stop |
|------------|----------|---------|------|----------|---------|
| tig0000094 | 3        | 70963   | Chr3 | 713389   | 646626  |

Consensus\_tig00000099 (70,965 bp) note that this contig does not overlap with other contig assigned to SS\_100012. The entirety of this contig aligns to chr3:1009204-930421. Its position relative to the gap region of SS\_100012 is somewhat ambiguous as I cannot anchor it to any sequence data in SS\_100012.

| S1         | S1 start | S1 stop | S2   | S2 start | S2 stop |
|------------|----------|---------|------|----------|---------|
| tig0000099 | 4        | 29945   | Chr3 | 1009204  | 979888  |
| tig0000099 | 34137    | 36167   | Chr3 | 979883   | 969995  |
| tig0000099 | 43666    | 83241   | Chr3 | 969990   | 930421  |

Consensus\_tig00000143 (83,162 bp) note that this contig does not overlap with other contig assigned to SS\_100012. The entirety of this contig aligns to chr3: 1013462-1090876. Its position relative to the gap region of SS\_100012 is somewhat ambiguous as it cannot be anchored to any sequence data in SS\_100012.

| S1         | S1 start | S1 stop | S2   | S2 start | S2 stop |
|------------|----------|---------|------|----------|---------|
| tig0000143 | 6441     | 28105   | Chr3 | 1090876  | 1068940 |
| tig0000143 | 30515    | 47431   | Chr3 | 1068937  | 1052035 |
| tig0000143 | 48779    | 83160   | Chr3 | 1052031  | 1013462 |

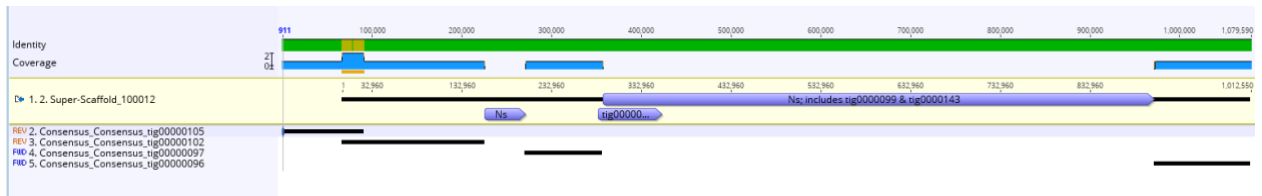

BOWLER ET AL 2008 reference CHR8 (1,007,773 bp)

HAPLOTYPE 1: Super-Scaffold\_100021 → telomere to telomere

- 1,204,650 bp (length supported by PFGE)

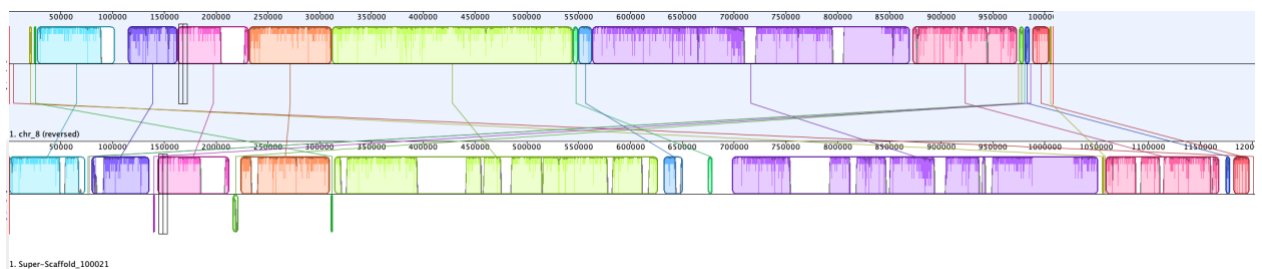

- Includes 6 canu contigs

1                    184598                    Consensus\_Consensus\_tig00000176 (-)

|        |         |                                      |
|--------|---------|--------------------------------------|
| 184599 | 208252  | GAP insertion 23,654 bp <sup>1</sup> |
| 208253 | 436163  | Consensus_Consensus_tig00000363 (+)  |
| 436164 | 436176  | GAP 13                               |
| 436177 | 674551  | Consensus_Consensus_tig00000364 (+)  |
| 674552 | 674564  | GAP 13                               |
| 674565 | 771567  | Consensus_Consensus_tig00000365 (+)  |
| 771568 | 771580  | GAP 13                               |
| 771581 | 892961  | Consensus_Consensus_tig00000384 (-)  |
| 892962 | 904090  | GAP insertion 11,129 bp <sup>2</sup> |
| 904091 | 1204650 | Consensus_Consensus_tig00000218 (+)  |

<sup>1</sup> GAP is resolved with Consensus\_tig00000179

- length: 69,770 bp
- coordinates:

| S1           | S1 start | S1 stop | S2          | S2 start | S2 stop |
|--------------|----------|---------|-------------|----------|---------|
| SS100021     | 259134   | 208254  | tig00000179 | 3        | 33521   |
| SS100021 GAP | 208252   | 184599  | tig00000179 | 33522    | 56757   |
| SS100021     | 184582   | 171550  | tig00000179 | 56758    | 69768   |

- Consensus\_tig00000179 blasts to BOWLER ET AL 2008 reference chr8

| S1          | S1 start | S1 stop | S2   | S2 start | S2 stop |
|-------------|----------|---------|------|----------|---------|
| tig00000179 | 3        | 69768   | Chr8 | 260722   | 190952  |

<sup>2</sup>GAP is not resolved with any of the unscaffolded <150 kb contigs

HAPLOTYPY 2: Super-Scaffold\_100017 → no telomeres resolved\*

- 1,228,605 bp (length supported by PFGE)

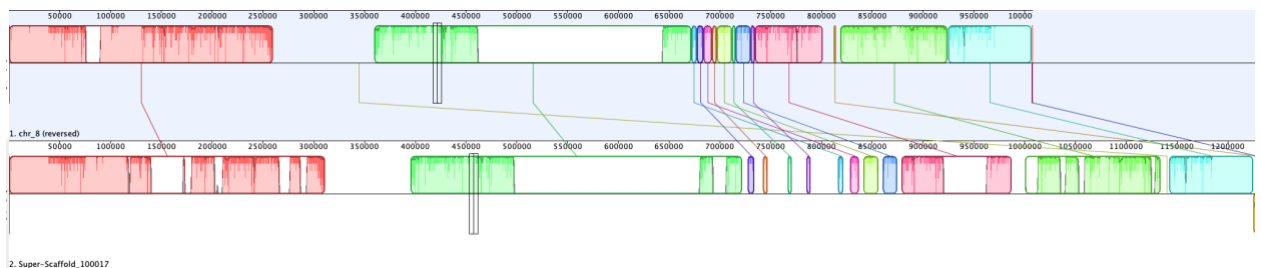

-\*note that this contig is longer than HAPLOTYPY 1 which has both telomeres. Is this a result of gaps? Large insertions?

- Includes 6 canu contigs

|        |        |                                     |
|--------|--------|-------------------------------------|
| 1      | 159605 | Consensus_Consensus_tig00000361 (+) |
| 159606 | 159618 | 13                                  |
| 159619 | 311613 | Consensus_Consensus_tig00000362 (+) |

|        |         |                                     |
|--------|---------|-------------------------------------|
| 311614 | 395706  | GAP 84,093 bp <sup>1</sup>          |
| 395707 | 496754  | Consensus_Consensus_tig00000182 (-) |
| 496755 | 679871  | GAP 183,117 bp <sup>2</sup>         |
| 679872 | 814957  | Consensus_Consensus_tig00000199 (-) |
| 814958 | 814970  | 13                                  |
| 814971 | 938115  | Consensus_Consensus_tig00000383 (-) |
| 938116 | 938128  | 13                                  |
| 938129 | 1228605 | Consensus_Consensus_tig00000382 (-) |

<sup>1</sup> GAP is not resolved with any of the unscaffolded <150 kb contigs

<sup>2</sup> GAP resolved by Consensus\_tig00000185 & Consensus\_tig00000366

Consensus\_tig00000185

- length: 148,468 bp

- coordinates:

| S1       | S1 start | S1 stop | S2          | S2 start | S2 stop |
|----------|----------|---------|-------------|----------|---------|
| SS100017 | 480624   | 496762  | tig00000185 | 3        | 16145   |

note that the remaining ~120 kb of tig00000185 extends into the gap region

- Consensus\_Consensus\_tig00000185 blasts to BOWLER ET AL 2008 reference chr8

| S1          | S1 start | S1 stop | S2   | S2 start | S2 stop |
|-------------|----------|---------|------|----------|---------|
| tig00000185 | 3        | 148466  | Chr8 | 444928   | 591667  |

Consensus\_tig00000366

- length: 64,458 bp

- coordinates:

| S1       | S1 start | S1 stop | S2          | S2 start | S2 stop |
|----------|----------|---------|-------------|----------|---------|
| SS100017 | 679918   | 706582  | tig00000366 | 37818    | 64456   |

note that the first ~37 kb of tig00000366 is in the gap region

- Consensus\_Consensus\_tig00000366 blasts to BOWLER ET AL 2008 reference chr8

| S1          | S1 start | S1 stop | S2   | S2 start | S2 stop |
|-------------|----------|---------|------|----------|---------|
| tig00000366 | 3        | 50532   | Chr8 | 605142   | 655965  |

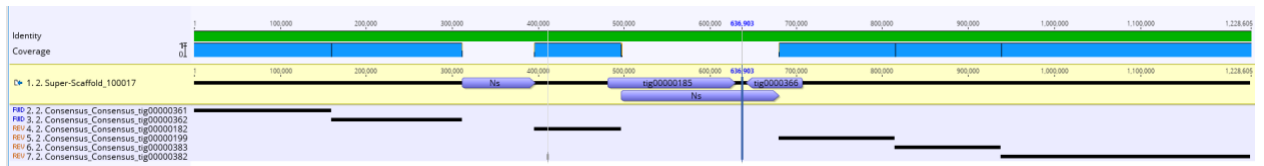

BOWLER ET AL 2008 reference CHR14 (829,358 bp)

HAPLOTYPE 1: Super-Scaffold\_100033 → telomere to telomere

- 854,044 bp (length supported by PFGE)

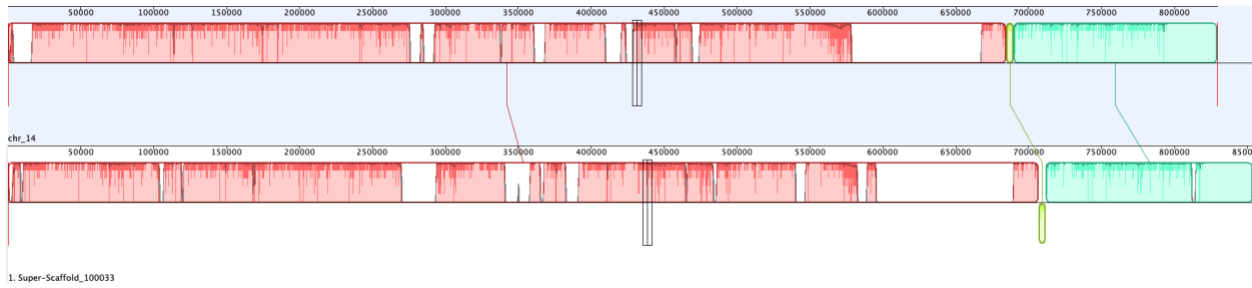

- Includes 2 canu contigs

1        594968      Consensus\_Consensus\_tig00000392 (-)  
 594969 688008      GAP 93,040 bp<sup>1</sup>  
 688009 854044      Consensus\_Consensus\_tig00000226 (+)

<sup>1</sup> GAP resolved with Consensus\_Consensus\_tig00000229 and  
 Consensus\_Consensus\_tig00000231

Consensus\_Consensus\_tig00000231

- length: 70,142 bp
- this unscaffolded contig can be anchored to SS\_100033 to fill in Bionano gap region
- coordinates:

| S1          | S1 start | S1 stop | S2        | S2 start | S2 stop | % id |
|-------------|----------|---------|-----------|----------|---------|------|
| tig00000231 | 25270    | 2       | SS 100033 | 689268   | 714561  | 99.5 |

- Consensus\_Consensus\_tig00000231 blasts to BOWLER ET AL 2008 reference chr14

| S1          | S1 start | S1 stop | S2    | S2 start | S2 stop | % id  |
|-------------|----------|---------|-------|----------|---------|-------|
| tig00000231 | 3        | 70140   | Chr14 | 136852   | 197031  | 99.07 |

Consensus\_Consensus\_tig00000229

- length: 63,350 bp
- this unscaffolded contig can be anchored to tig00000231 to fill in Bionano gap region
- coordinates:

| S1          | S1 start | S1 stop | S2          | S2 start | S2 stop | % id |
|-------------|----------|---------|-------------|----------|---------|------|
| tig00000229 | 44127    | 63350   | tig00000231 | 70142    | 50926   | 99.5 |

- Consensus\_Consensus\_tig00000299 blasts to BOWLER ET AL 2008 reference chr14

| S1          | S1 start | S1 stop | S2    | S2 start | S2 stop | % id |
|-------------|----------|---------|-------|----------|---------|------|
| tig00000299 | 63348    | 3       | Chr14 | 179780   | 246300  | 88.2 |

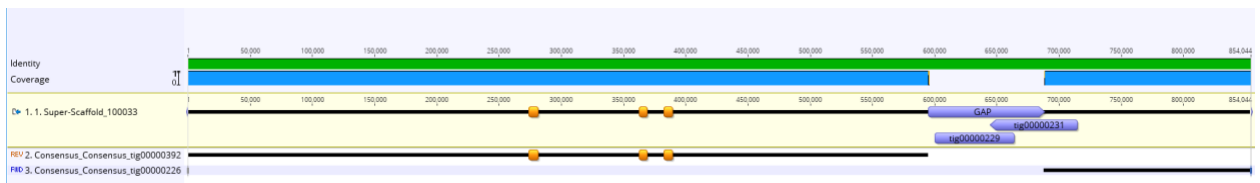

HAPLOTYPING 2: Super-Scaffold\_100025 → no telomeres resolved

- 698,686 bp

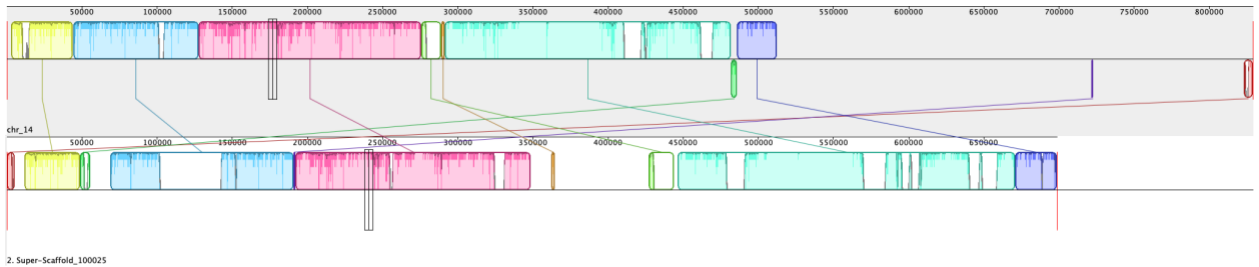

- Includes 4 canu contigs

|        |        |                                     |
|--------|--------|-------------------------------------|
| 1      | 122769 | Consensus_Consensus_tig00000390 (+) |
| 122770 | 122782 | 13                                  |
| 122783 | 373081 | Consensus_Consensus_tig00000391 (+) |
| 373082 | 373094 | 13                                  |
| 373095 | 569659 | Consensus_Consensus_tig00000236 (-) |
| 569660 | 569672 | 13                                  |
| 569673 | 698686 | Consensus_Consensus_tig00000251 (-) |

- There are two unscaffolded contigs (tig00002810 & tig00002811; see below) that align towards the end of reference chr14. SS\_100025 lacks synteny to that region of reference chr14 so it is likely that those contigs should be assigned to SS\_100025
- Interestingly, both contigs align to the same region of reference chr14. HAPLOTYPE 1 (SS\_100033) includes sequence data homologous to that region of reference chr14.
- Neither contig can be anchored to SS\_100025.

- Consensus\_Consensus\_tig00002810 (84,025 bp) blasts to BOWLER ET AL 2008 reference chr14

| S1          | S1 start | S1 stop | S2    | S2 start | S2 stop | % id |
|-------------|----------|---------|-------|----------|---------|------|
| tig00002810 | 84021    | 3       | Chr14 | 751157   | 829060  | 98.5 |

- Consensus\_Consensus\_tig00002811 (63,756 bp) blasts to BOWLER ET AL 2008 reference chr14

| S1          | S1 start | S1 stop | S2    | S2 start | S2 stop | % id |
|-------------|----------|---------|-------|----------|---------|------|
| tig00002811 | 63754    | 3       | Chr14 | 750432   | 808788  | 94.3 |
