# Supplementary material for: Re-examination of two diatom reference genomes using long-read sequencing
Source: PubMed Central journal article supplement (PMC8147415; doi:10.1186/s12864-021-07666-3), 2021-05-24
Supplement: 12864_2021_7666_MOESM2_ESM.pdf [file 12864_2021_7666_MOESM2_ESM.pdf]

Supplementary Table 1. Detailed raw read data summary for unfiltered, Albacore “pass” and filtered Oxford Nanopore long-read sequencing datasets for *Thalassiosira pseudonana* and *Phaeodactylum tricornutum*. The filtered datasets for *T. pseudonana* and *P. tricornutum* included reads  $\geq 30$  kb and  $\geq 20$  kb, respectively.

| <i>Thalassiosira pseudonana</i>                                        |                                |                                 | <i>Phaeodactylum tricornutum</i> |                                |                                 |                                |
|------------------------------------------------------------------------|--------------------------------|---------------------------------|----------------------------------|--------------------------------|---------------------------------|--------------------------------|
|                                                                        | Unfiltered Data                | Albacore “pass” Data            | Filtered Data                    | Unfiltered Data                | Albacore “pass” Data            | Filtered Data                  |
| <b>General Summary</b>                                                 |                                |                                 |                                  |                                |                                 |                                |
| Total bases (bp)                                                       | 7,445,183,025                  | 6,987,392,466                   | 1,772,209,890                    | 8,199,773,433                  | 7,500,371,505                   | 2,700,036,591                  |
| No. of reads                                                           | 701,596                        | 580,845                         | 46,708                           | 986,604                        | 820,187                         | 84,445                         |
| Read length N50 (bp)                                                   | 20,088                         | 20,514                          | 37,303                           | 18,756                         | 19,261                          | 32,648                         |
| Mean read length (bp)                                                  | 10,611.8                       | 12,029.7                        | 37,942.3                         | 8,311.1                        | 9,144.7                         | 31,973.9                       |
| Mean read quality                                                      | 9.9                            | 10.8                            | 10.9                             | 8.5                            | 9.2                             | 9.6                            |
| Median read length (bp)                                                | 6,755                          | 8,578.0                         | 36,095                           | 3,815                          | 4,537.0                         | 29,187                         |
| Median read quality                                                    | 10.5                           | 11.1                            | 11.2                             | 8.9                            | 9.2                             | 9.6                            |
| <b>Number, percentage and megabases of reads above quality cutoffs</b> |                                |                                 |                                  |                                |                                 |                                |
| Q5                                                                     | 641,236 (91.4%)<br>7,416.7 Mbp | 580,845 (100.0%)<br>6,987.4 Mbp | 46,708 (100.0%)<br>1,772.2 Mbp   | 917,011 (92.9%)<br>8,141.7 Mbp | 820,187 (100.0%)<br>7,500.4 Mbp | 84,445 (100.0%)<br>2,700.0 Mbp |
| Q7                                                                     | 580,397 (82.7%)<br>6,982.1 Mbp | 580,329 (99.9%)<br>6,982.1 Mbp  | 46,676 (99.9%)<br>1,771.0 Mbp    | 819,256 (83.0%)<br>7,513.9 Mbp | 819,380 (99.9%)<br>7,494.6 Mbp  | 84,445 (100.0%)<br>2,700.0 Mbp |
| Q10                                                                    | 391,138 (55.7%)<br>4,788.0 Mbp | 391,138 (67.3%)<br>4,788.0 Mbp  | 32,875 (70.4%)<br>1,251.2 Mbp    | 189,235 (19.2%)<br>1,681.4 Mbp | 195,528 (23.8%)<br>1,694.8 Mbp  | 25,313 (30.0%)<br>790.5 Mbp    |
| Q12                                                                    | 192,403 (27.4%)<br>2,321.3 Mbp | 192,403 (33.1%)<br>2,321.3 Mbp  | 16,143 (34.6%)<br>614.2 Mbp      | 6,828 (0.7%)<br>55.5 Mbp       | 7,207 (0.9%)<br>56.4 Mbp        | 786 (0.9%)<br>23.6 Mbp         |
| Q15                                                                    | 111 (0.0%)<br>0.3 Mbp          | 111 (0.0%)<br>0.3 Mbp           | 0 (0.0%)<br>0.0 Mbp              | 0 (0.0%)<br>0.0 Mbp            | 1 (0.0%)<br>0.0 Mbp             | 0 (0.0%)<br>0.0 Mbp            |
| <b>Top 5 highest mean base-call quality scores and read lengths</b>    |                                |                                 |                                  |                                |                                 |                                |
| 1                                                                      | 16.3 (712)                     | 16.3 (712)                      | 15.0 (36,789)                    | 14.9 (1,287)                   | 15.1 (769)                      | 14.2 (25,833)                  |
| 2                                                                      | 16.1 (776)                     | 16.1 (776)                      | 14.9 (38,761)                    | 14.9 (7,981)                   | 15.0 (725)                      | 14.1 (38,993)                  |
| 3                                                                      | 16.1 (696)                     | 16.1 (696)                      | 14.8 (34,635)                    | 14.8 (2,594)                   | 15.0 (1,256)                    | 14.0 (34,753)                  |
| 4                                                                      | 15.9 (495)                     | 15.9 (495)                      | 14.7 (32,641)                    | 14.7 (757)                     | 14.9 (7,948)                    | 13.9 (33,295)                  |
| 5                                                                      | 15.9 (2,188)                   | 15.9 (2,188)                    | 14.6 (45,800)                    | 14.6 (2,052)                   | 14.9 (2,576)                    | 13.9 (22,405)                  |
| <b>Top 5 longest reads and mean basecall quality score</b>             |                                |                                 |                                  |                                |                                 |                                |
| 1                                                                      | 122,142 Mbp (12.3)             | 122,142 Mbp (12.3)              | 122,142 Mbp (12.3)               | 282,534 Mbp (6.4)              | 140,471 Mbp (8.4)               | 140,471 Mbp (8.4)              |
| 2                                                                      | 110,728 Mbp (8.5)              | 110,728 Mbp (8.5)               | 110,728 Mbp (8.5)                | 140,502 Mbp (8.4)              | 139,006 Mbp (9.1)               | 139,006 Mbp (9.1)              |
| 3                                                                      | 99,505 Mbp (10.4)              | 99,505 Mbp (10.4)               | 99,505 Mbp (10.4)                | 139,039 Mbp (9.1)              | 125,792 Mbp (8.5)               | 125,792 Mbp (8.5)              |
| 4                                                                      | 97,967 Mbp (9.1)               | 97,967 Mbp (9.1)                | 97,967 Mbp (9.1)                 | 125,837 Mbp (8.5)              | 125,267 Mbp (9.9)               | 125,267 Mbp (9.9)              |
| 5                                                                      | 97,308 Mbp (10.2)              | 97,308 Mbp (10.2)               | 97,308 Mbp (10.2)                | 125,299 Mbp (9.9)              | 120,285 Mbp (9.5)               | 120,285 Mbp (9.5)              |
