# Supplementary material for: Re-examination of two diatom reference genomes using long-read sequencing
Source: PubMed Central journal article supplement (PMC8147415; doi:10.1186/s12864-021-07666-3), 2021-05-24
Supplement: 12864_2021_7666_MOESM3_ESM.pdf [file 12864_2021_7666_MOESM3_ESM.pdf]

Supplementary Table 2. Assembly statistics for various polishing iterations of the de novo long-read derived genomes for *Thalassiosira pseudonana* and *Phaeodactylum tricornutum*. Asterisks indicate the final working assembly for each species.

| Assembly                         |                                           | Total length (Mbp) | Read depth coverage | No. contigs | Largest contig (Mbp) | Contig N50 (Mbp) | Contig L50 | G+C content (%) | % identity to reference | Busco completeness | ALE score      |
|----------------------------------|-------------------------------------------|--------------------|---------------------|-------------|----------------------|------------------|------------|-----------------|-------------------------|--------------------|----------------|
| <i>Phaeodactylum tricornutum</i> | Canu unpolished                           | 56.5               | 40x                 | 291         | 2.49                 | 0.25             | 43         | 48.7            | 98.5                    | C:29.1%            | -1,142,001,685 |
|                                  | Canu + Racon 2x                           | 56.9               | 40x                 | 291         | 2.50                 | 0.25             | 43         | 48.7            | 98.8                    | C:54.8%            | -1,030,248,077 |
|                                  | Canu + Racon 2x + Nanopolish              | 57.0               | 40x                 | 291         | 2.51                 | 0.25             | 43         | 48.7            | 99.1                    | C:77.3%            | -808,873,077   |
|                                  | Canu + Racon 2x + Nanopolish + Pilon 28x  | 57.0               | 40x                 | 291         | 2.51                 | 0.25             | 43         | 48.7            | 99.3                    | C:85.4%            | -734,959,595   |
|                                  | Flye unpolished                           | 33.8               | 72x                 | 204         | 1.68                 | 0.37             | 24         | 48.4            | 98.4                    | C:22.1%            | -1,157,066,360 |
|                                  | Flye + Racon 2x                           | 33.5               | 72x                 | 196         | 1.66                 | 0.36             | 24         | 48.6            | 98.7                    | C:49.2%            | -1,002,003,578 |
|                                  | Flye + Racon 2x + Nanopolish              | 33.4               | 72x                 | 196         | 1.66                 | 0.36             | 24         | 48.7            | 99.0                    | C:70.6%            | -848,932,570   |
|                                  | Flye + Racon 2x + Nanopolish + Pilon 19x* | 33.5               | 72x                 | 196         | 1.66                 | 0.36             | 24         | 48.7            | 99.1                    | C:80.9%            | -781,367,384   |
| <i>Thalassiosira pseudonana</i>  | Canu unpolished                           | 46.8               | 40x                 | 222         | 2.75                 | 0.97             | 14         | 46.8            | 98.4                    | C:25.7%            | -1,789,994,248 |
|                                  | Canu + Racon 2x                           | 47.0               | 40x                 | 222         | 2.78                 | 0.99             | 14         | 46.8            | 98.9                    | C:46.2%            | -1,625,885,182 |
|                                  | Canu + Racon 2x + Nanopolish              | 47.4               | 40x                 | 222         | 2.77                 | 0.98             | 14         | 46.9            | 99.3                    | C:76.9%            | -976,974,396   |
|                                  | Canu + Racon 2x + Nanopolish + Pilon 18x  | 47.3               | 40x                 | 222         | 2.77                 | 0.98             | 14         | 46.9            | 99.4                    | C:79.2%            | -1,238,092,187 |
|                                  | Flye unpolished                           | 34.0               | 48x                 | 57          | 2.77                 | 1.38             | 8          | 46.8            | 98.8                    | C:31.7%            | -1,341,668,132 |
|                                  | Flye + Racon 2x                           | 33.8               | 48x                 | 50          | 2.76                 | 1.38             | 8          | 46.8            | 98.9                    | C:49.2%            | -1,302,425,801 |
|                                  | Flye + Racon 2x + Nanopolish              | 33.8               | 48x                 | 50          | 2.76                 | 1.38             | 8          | 46.9            | 99.3                    | C:77.2%            | -1,106,746,104 |
|                                  | Flye + Racon 2x + Nanopolish + Pilon 20x* | 33.8               | 48x                 | 52          | 2.76                 | 1.38             | 8          | 47.0            | 99.4                    | C:80.6%            | -1,047,071,217 |
