# Supplementary material for: Re-examination of two diatom reference genomes using long-read sequencing
Source: PubMed Central journal article supplement (PMC8147415; doi:10.1186/s12864-021-07666-3), 2021-05-24
Supplement: 12864_2021_7666_MOESM6_ESM.pdf [file 12864_2021_7666_MOESM6_ESM.pdf]

Supplementary Table 5. Structural variation between the polished de novo Canu and Flye assemblies and the reference genomes for *Phaeodactylum tricornutum* and *Thalassiosira pseudonana*.

|                        |                  | <i>Phaeodactylum tricornutum</i> |           | <i>Thalassiosira pseudonana</i> |          |
|------------------------|------------------|----------------------------------|-----------|---------------------------------|----------|
|                        |                  | Canu                             |           | Flye                            |          |
| Variant category       | Size range       | Count                            | Total bp  | Count                           | Total bp |
| Insertion              | 25-50 bp         | 141                              | 4,573     | 55                              | 1,730    |
|                        | 50-500 bp        | 130                              | 28,450    | 79                              | 16,650   |
|                        | 500-4,000 bp     | 147                              | 251,899   | 64                              | 99,587   |
|                        | 4,000-10,000 bp  | 187                              | 1,188,029 | 17                              | 103,180  |
|                        | 10,000-50,000 bp | 19                               | 286,290   | 0                               | 0        |
|                        | Total            | 624                              | 1,759,241 | 215                             | 221,147  |
| Deletion               | 25-50 bp         | 136                              | 4,350     | 292                             | 9,675    |
|                        | 50-500 bp        | 136                              | 25,699    | 78                              | 10,359   |
|                        | 500-4,000 bp     | 65                               | 92,862    | 18                              | 33,345   |
|                        | 4,000-10,000 bp  | 33                               | 182,423   | 7                               | 41,834   |
|                        | 10,000-50,000 bp | 3                                | 33,555    | 0                               | 0        |
|                        | Total            | 373                              | 338,889   | 395                             | 95,213   |
| Tandem expansion       | 25-50 bp         | 0                                | 0         | 0                               | 0        |
|                        | 50-500 bp        | 28                               | 7,732     | 20                              | 5,378    |
|                        | 500-4,000 bp     | 100                              | 156,993   | 83                              | 138,699  |
|                        | 4,000-10,000 bp  | 38                               | 349,511   | 23                              | 141,259  |
|                        | 10,000-50,000 bp | 22                               | 356,201   | 18                              | 260,192  |
|                        | Total            | 188                              | 870,437   | 144                             | 545,528  |
| Tandem contraction     | 25-50 bp         | 0                                | 0         | 0                               | 0        |
|                        | 50-500 bp        | 7                                | 1,081     | 10                              | 1,975    |
|                        | 500-4,000 bp     | 4                                | 5,601     | 8                               | 14,718   |
|                        | 4,000-10,000 bp  | 12                               | 89,581    | 1                               | 4,055    |
|                        | 10,000-50,000 bp | 7                                | 113,143   | 1                               | 19,288   |
|                        | Total            | 30                               | 209,406   | 20                              | 40,036   |
| Repeat expansion       | 25-50 bp         | 5                                | 177       | 6                               | 210      |
|                        | 50-500 bp        | 46                               | 9,861     | 36                              | 7,752    |
|                        | 500-4,000 bp     | 14                               | 120,371   | 29                              | 50,779   |
|                        | 4,000-10,000 bp  | 103                              | 332,319   | 7                               | 46,568   |
|                        | 10,000-50,000 bp | 28                               | 404,521   | 0                               | 0        |
|                        | Total            | 196                              | 867,249   | 78                              | 105,380  |
| Repeat contraction     | 25-50 bp         | 6                                | 194       | 6                               | 222      |
|                        | 50-500 bp        | 44                               | 9,283     | 39                              | 9,338    |
|                        | 500-4,000 bp     | 16                               | 90,900    | 25                              | 44,439   |
|                        | 4,000-10,000 bp  | 70                               | 166,181   | 9                               | 53,473   |
|                        | 10,000-50,000 bp | 22                               | 372,826   | 4                               | 87,343   |
|                        | Total            | 158                              | 639,384   | 83                              | 194,815  |
| Total for all variants |                  | 1,569                            | 4.68 Mbp  | 935                             | 1.20 Mbp |
|                        |                  | 1,281                            | 4.68 Mbp  | 576                             | 1.19 Mbp |
