# Supplementary material for: Re-examination of two diatom reference genomes using long-read sequencing
Source: PubMed Central journal article supplement (PMC8147415; doi:10.1186/s12864-021-07666-3), 2021-05-24
Supplement: 12864_2021_7666_MOESM9_ESM.pdf [file 12864_2021_7666_MOESM9_ESM.pdf]

Supplementary Table 8. Comparison of RepeatMasker determined repetitive content for the final polished long-read working assembly and the reference genome for *Phaeodactylum tricornutum*. Note that the numbers reported for LTR elements include full-length, nested and decaying elements.

|                                | Canu                                                                    |                      |                  | Reference                                                              |                      |               |
|--------------------------------|-------------------------------------------------------------------------|----------------------|------------------|------------------------------------------------------------------------|----------------------|---------------|
|                                | total length: 57.0 Mbp<br>contigs:291<br>bases masked: 11.3 Mbp (19.9%) |                      |                  | total length: 27.4 Mbp<br>contigs: 88<br>bases masked: 2.22 Mbp (8.1%) |                      |               |
|                                | number of<br>elements                                                   | length occupied (bp) | % of<br>sequence | number of<br>elements                                                  | length occupied (bp) | % of sequence |
| SINEs:                         | 42                                                                      | 136,946              | 0.2              | 0                                                                      | 0                    | 0             |
| ALUs                           | 0                                                                       | 0                    | 0                | 0                                                                      | 0                    | 0             |
| MIRs                           | 0                                                                       | 0                    | 0                | 0                                                                      | 0                    | 0             |
| LINEs:                         | 90                                                                      | 145,343              | 0.3              | 0                                                                      | 0                    | 0             |
| LINE1                          | 0                                                                       | 0                    | 0                | 0                                                                      | 0                    | 0             |
| LINE2                          | 0                                                                       | 0                    | 0                | 0                                                                      | 0                    | 0             |
| L3/CR1                         | 0                                                                       | 0                    | 0                | 0                                                                      | 0                    | 0             |
| LTR elements:                  | 4,703                                                                   | 8,186,677            | 14.4             | 1,383                                                                  | 1,574,225            | 5.7           |
| ERVL                           | 0                                                                       | 0                    | 0                | 0                                                                      | 0                    | 0             |
| ERVL-MaLRs                     | 0                                                                       | 0                    | 0                | 0                                                                      | 0                    | 0             |
| ERV_classI                     | 0                                                                       | 0                    | 0                | 0                                                                      | 0                    | 0             |
| ERV_classII                    | 7                                                                       | 7,321                | 1                | 0                                                                      | 0                    | 0             |
| DNA elements:                  | 770                                                                     | 581,421              | 1.0              | 323                                                                    | 192,701              | 0.7           |
| hAT-Charlie                    | 225                                                                     | 89,154               | 0.2              | 73                                                                     | 19,894               | 0.1           |
| TcMar-Tigger                   | 0                                                                       | 0                    | 0                | 0                                                                      | 0                    | 0             |
| Unclassified:                  | 4,325                                                                   | 2,110,412            | 3.7              | 1,745                                                                  | 447,030              | 1.6           |
| Total interspersed<br>repeats: |                                                                         | 11,160,799           | 19.6             |                                                                        | 2,213,956            | 8.1           |
| Small RNA:                     | 20                                                                      | 66,328               | 0.1              | 0                                                                      | 0                    | 0             |
| Satellites:                    | 37                                                                      | 4,179                | 0.01             | 0                                                                      | 0                    | 0             |
| Simple repeats:                | 90                                                                      | 111,515              | 0.2              | 35                                                                     | 5,794                | 0.02          |
| Low complexity:                | 0                                                                       | 0                    | 0                | 0                                                                      | 0                    | 0             |
