# Supplementary material for: Re-examination of two diatom reference genomes using long-read sequencing
Source: PubMed Central journal article supplement (PMC8147415; doi:10.1186/s12864-021-07666-3), 2021-05-24
Supplement: 12864_2021_7666_MOESM10_ESM.pdf [file 12864_2021_7666_MOESM10_ESM.pdf]

Supplementary Table 9. Comparison of RepeatMasker determined repetitive content for the final polished long-read working assembly and the reference genome for *Thalassiosira pseudonana*. Note that the numbers reported for LTR elements include full-length, nested and decaying elements.

|                    | Flye                                                                   |                      |               | Reference                                                        |                      |               |
|--------------------|------------------------------------------------------------------------|----------------------|---------------|------------------------------------------------------------------|----------------------|---------------|
|                    | total length: 33.8 Mbp<br>contigs: 52<br>bases masked: 2.55 Mbp (7.6%) |                      |               | length: 32.4 Mbp<br>contigs: 64<br>bases masked: 1.03 Mbp (3.2%) |                      |               |
|                    | number of elements                                                     | length occupied (bp) | % of sequence | number of elements                                               | length occupied (bp) | % of sequence |
| SINEs:             | 0                                                                      | 0                    | 0             | 0                                                                | 0                    | 0             |
| ALUs               | 0                                                                      | 0                    | 0             | 0                                                                | 0                    | 0             |
| MIRs               | 0                                                                      | 0                    | 0             | 0                                                                | 0                    | 0             |
| LINEs:             | 222                                                                    | 223,759              | 0.7           | 175                                                              | 86,304               | 0.3           |
| LINE1              | 0                                                                      | 0                    | 0             | 0                                                                | 0                    | 0             |
| LINE2              | 0                                                                      | 0                    | 0             | 0                                                                | 0                    | 0             |
| L3/CR1             | 0                                                                      | 0                    | 0             | 0                                                                | 0                    | 0             |
| LTR elements:      | 808                                                                    | 737,184              | 2.2           | 545                                                              | 245,854              | 0.8           |
| ERV_L              | 0                                                                      | 0                    | 0             | 0                                                                | 0                    | 0             |
| ERV_L-MaLRs        | 0                                                                      | 0                    | 0             | 0                                                                | 0                    | 0             |
| ERV_classI         | 0                                                                      | 0                    | 0             | 0                                                                | 0                    | 0             |
| ERV_classII        | 0                                                                      | 0                    | 0             | 0                                                                | 0                    | 0             |
| DNA elements:      | 454                                                                    | 314,007              | 0.9           | 329                                                              | 113,973              | 0.4           |
| hAT-Charlie        | 0                                                                      | 0                    | 0             | 0                                                                | 0                    | 0             |
| TcMar-Tigger       | 0                                                                      | 0                    | 0             | 0                                                                | 0                    | 0             |
| Unclassified:      | 2,630                                                                  | 1,118,054            | 3.3           | 1542                                                             | 521,581              | 1.61          |
| Total interspersed |                                                                        | 2,393,004            | 7.1           |                                                                  | 967,712              | 3.0           |
| Small RNA:         | 43                                                                     | 72,753               | 0.2           | 0                                                                | 0                    | 0             |
| Satellites:        | 95                                                                     | 70,767               | 0.2           | 40                                                               | 24,498               | 0.1           |
| Simple repeats:    | 80                                                                     | 17,638               | 0.1           | 92                                                               | 43,971               | 0.1           |
| Low complexity:    | 0                                                                      | 0                    | 0             | 0                                                                | 0                    | 0             |
