# Supplementary material for: Re-examination of two diatom reference genomes using long-read sequencing
Source: PubMed Central journal article supplement (PMC8147415; doi:10.1186/s12864-021-07666-3), 2021-05-24
Supplement: 12864_2021_7666_MOESM14_ESM.pdf [file 12864_2021_7666_MOESM14_ESM.pdf]

## Sample preparation

1. SDS-based cell lysis
2. Phenol chloroform DNA extraction
3. Ethanol precipitation
4. DNA assessment
  1. Quality (A260/230 & A260/280)
  2. Quantity (Qubit Fluorometer)
  3. Integrity (1% w/v agarose gel)

## Library Preparation & Sequencing

1. **Prepare DNA library:** ONT 1D Ligation Sequencing Kit (SQK-LSK108) and the “1D gDNA selecting for long reads” protocol
2. **Load DNA library** on MinION R9.4 SpotON flow cell
3. **Sequence** via MinKNOW software (v1.7.14)

## Data Pre-processing

1. **Basecall** fast5 sequence data (Albacore v2.1.7)
2. **Remove** 1D sequencing adapters (Porechop v0.2.3)
3. **Filter** fastq reads by quality & length (Filtlong v0.1.0)
4. **Generate read dataset statistics** (NanoPlot v0.20.1)

## De novo Genome assembly & evaluation

1. **Assemble de novo genomes**
  1. Canu (v1.6)
  2. Flye (v2.3)
2. **Genome correction & polishing**
  1. Racon (v1.3.1)
  2. Nanopolish (v0.10.1)
  3. Pilon v1.22 (via Unicycler-polish v0.4.4)
3. **Genome evaluation**
  1. **Assembly statistics** (QUAST)
  2. **Assembly Likelihood Evaluation**
  3. **Genome completeness** (BUSCO v3.0.2)
  4. **Ploidy** (ploidyNGS v3.0)
  5. **Repetitive content** (RepeatMasker v4.0.7)

## Comparative analyses

1. **Align** de novo and reference genomes (NUCmer v3.1; MAUVE)
2. **Detect** structural variation (Assemblytics)
3. **Compare** LTR-RT loci (LTR\_finder v1.07 & LTR\_retriever v2.7)

## Gene prediction

1. **Transcriptome assembly**
  1. **Filter** RNA-Seq reads (Trimmomatic v0.36)
  2. **Map** reads against de novo genome (hisat2 v2.2.0)
  3. **Assemble** reads (Trinity v2.9.1)
2. **Predict genes** (BRAKER v2, gene set correction by PASA)
3. **Infer Orthologous groups** (Broccoli v1.2)

**A** Unfiltered reads

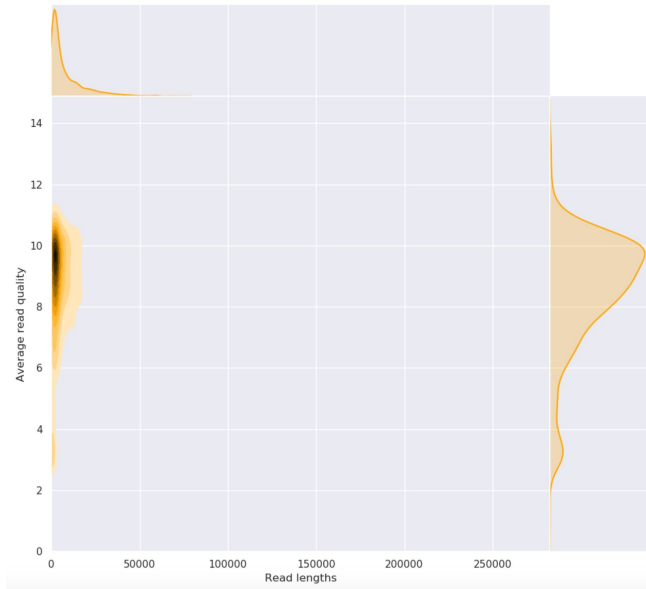

**B** Filtered reads > 20kb, Q7

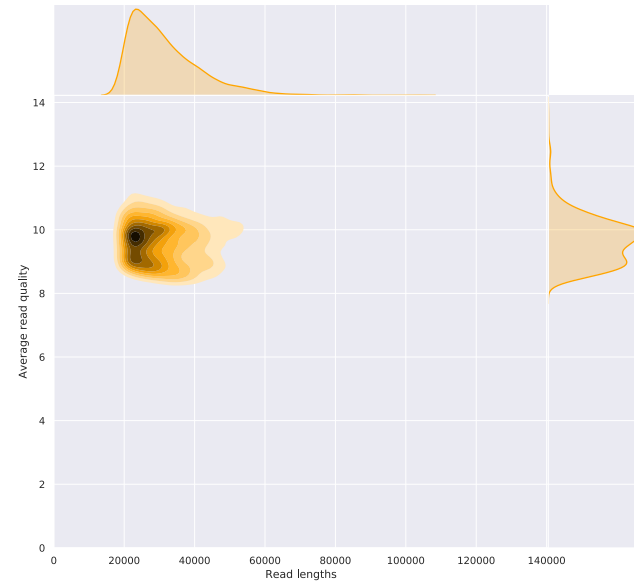

**C** Unfiltered reads

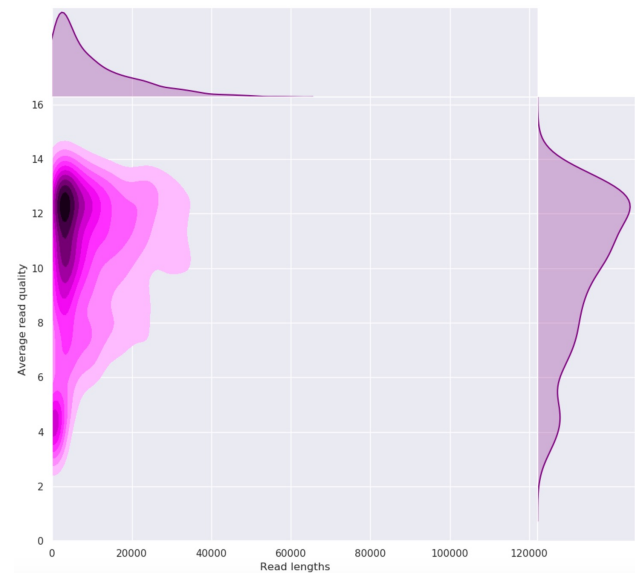

**D** Filtered reads > 30 kb, Q7

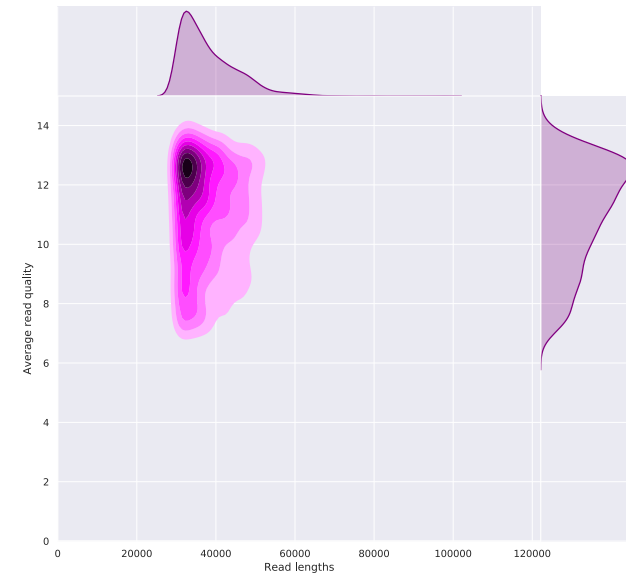

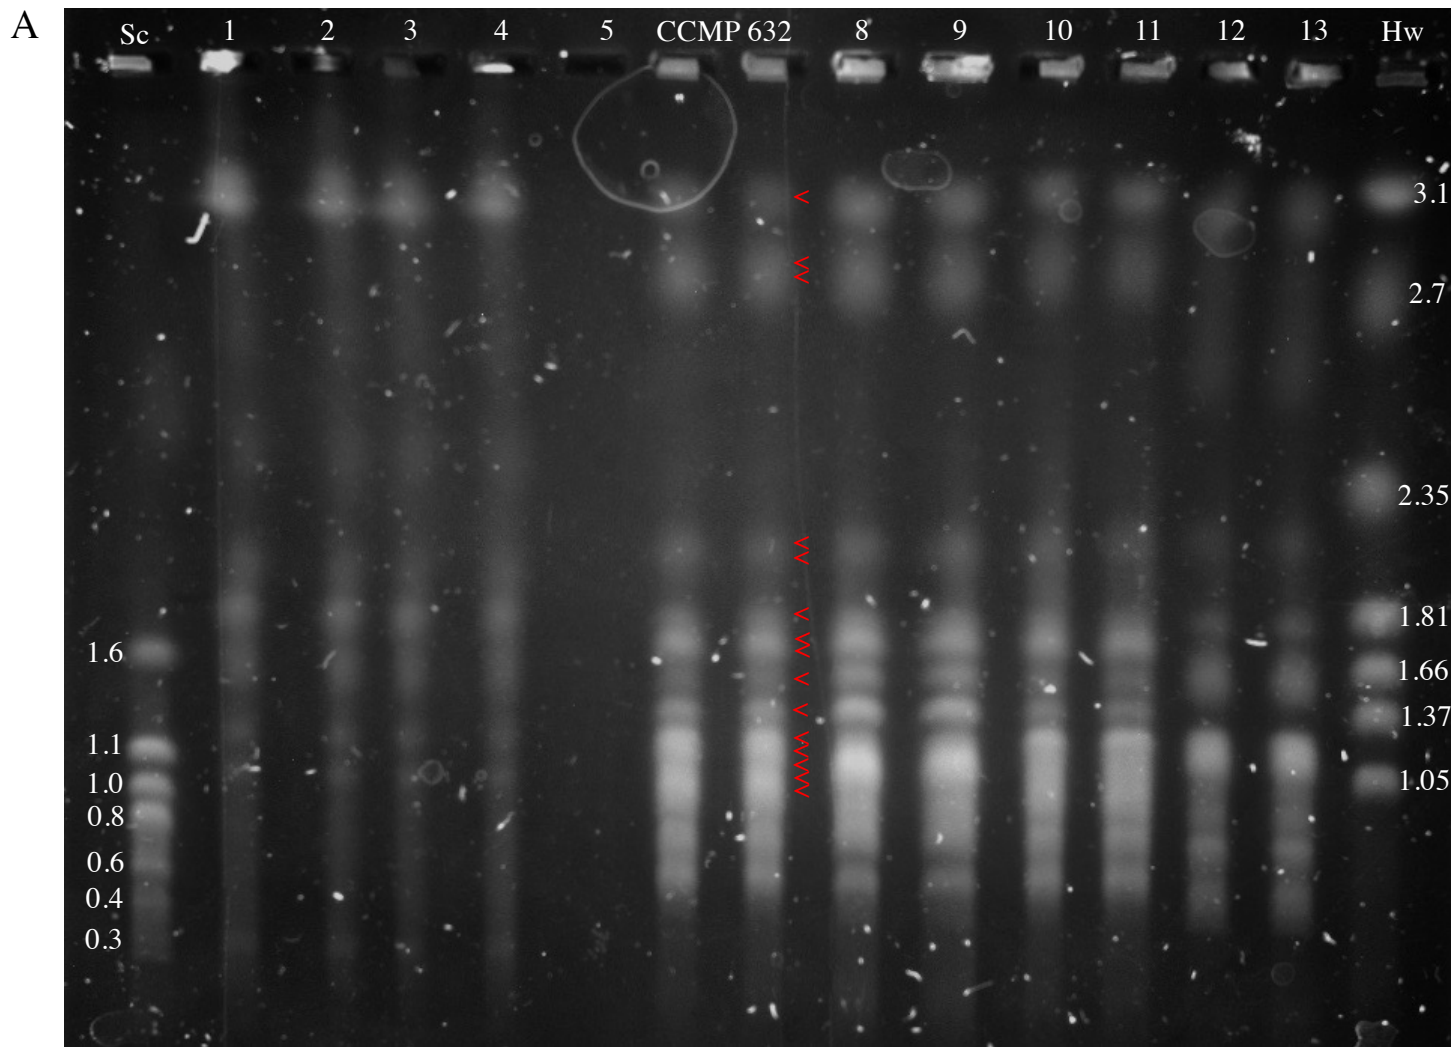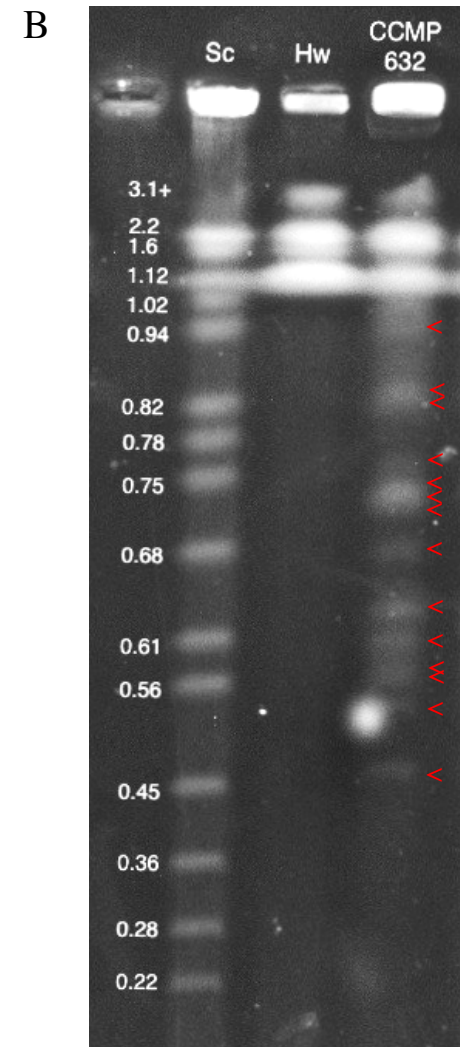

Supplementary Figure 3

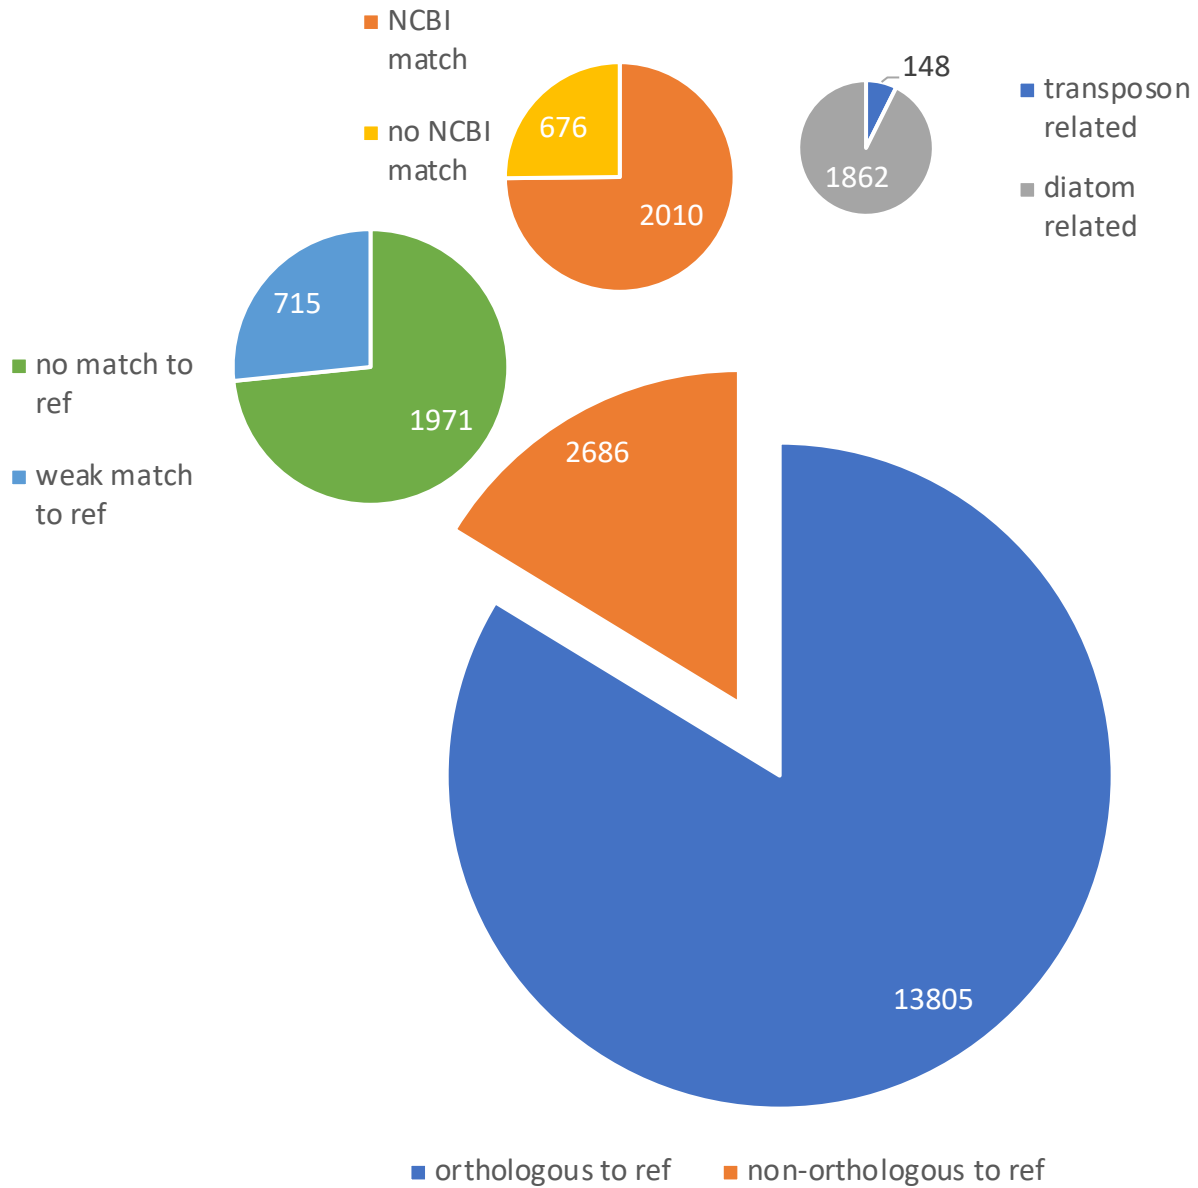

Supplementary Figure 4

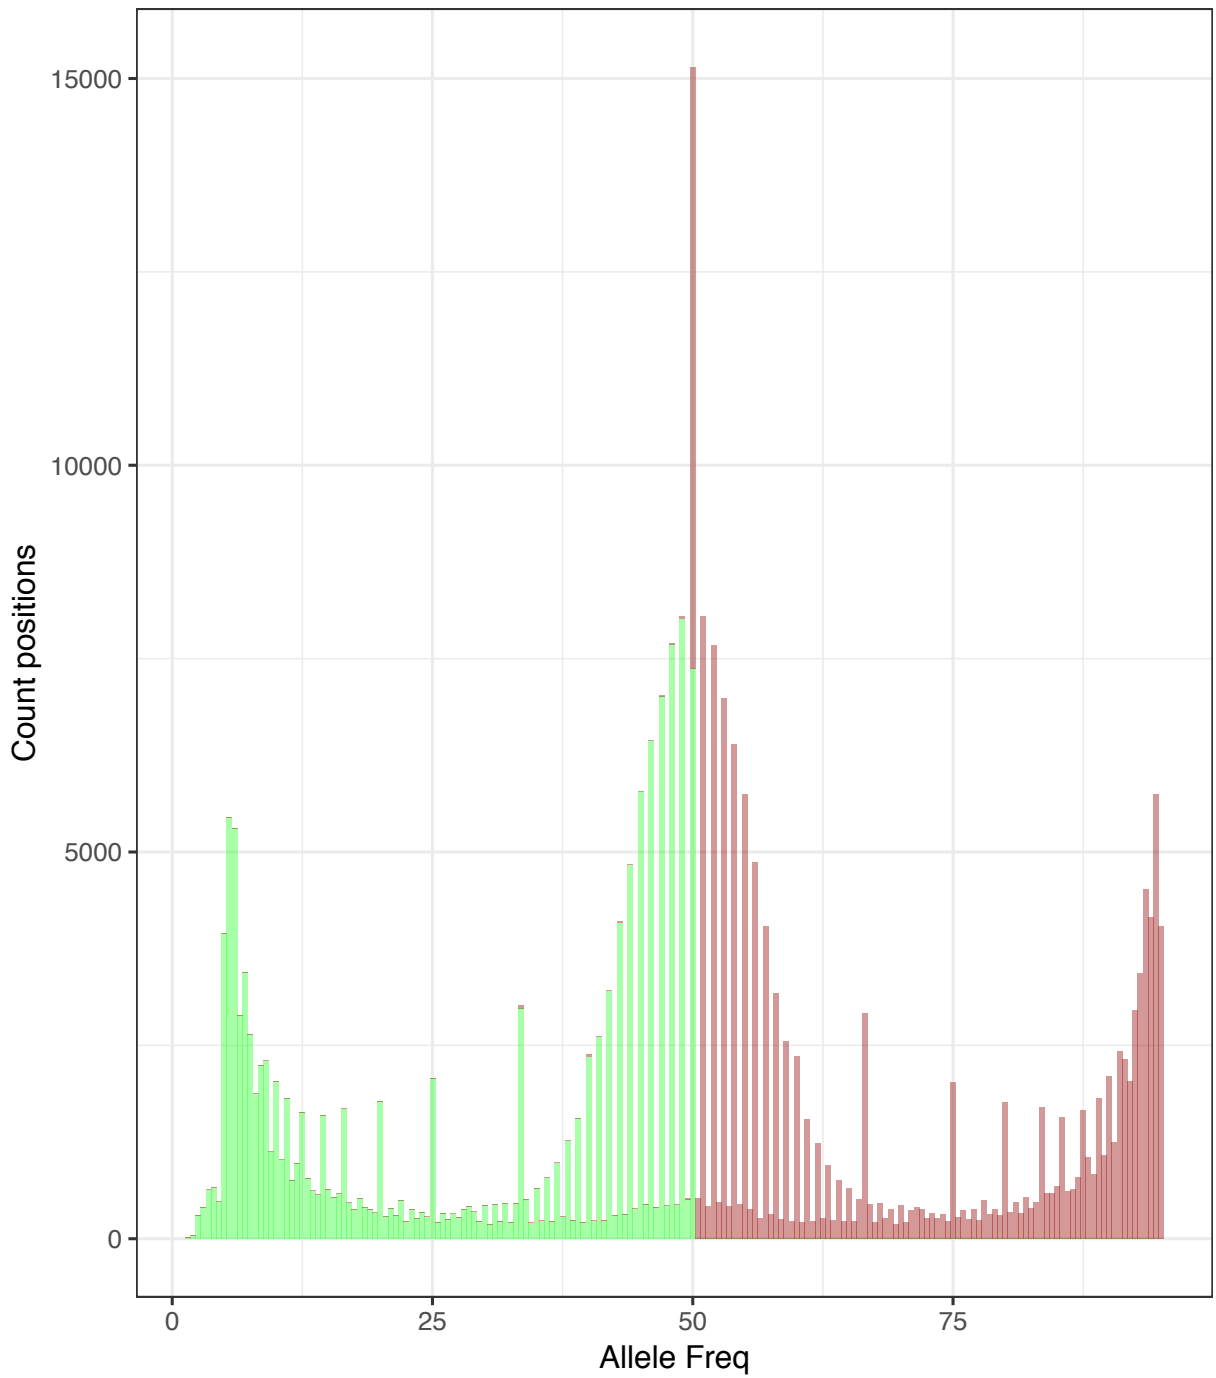

Supplementary Figure 5

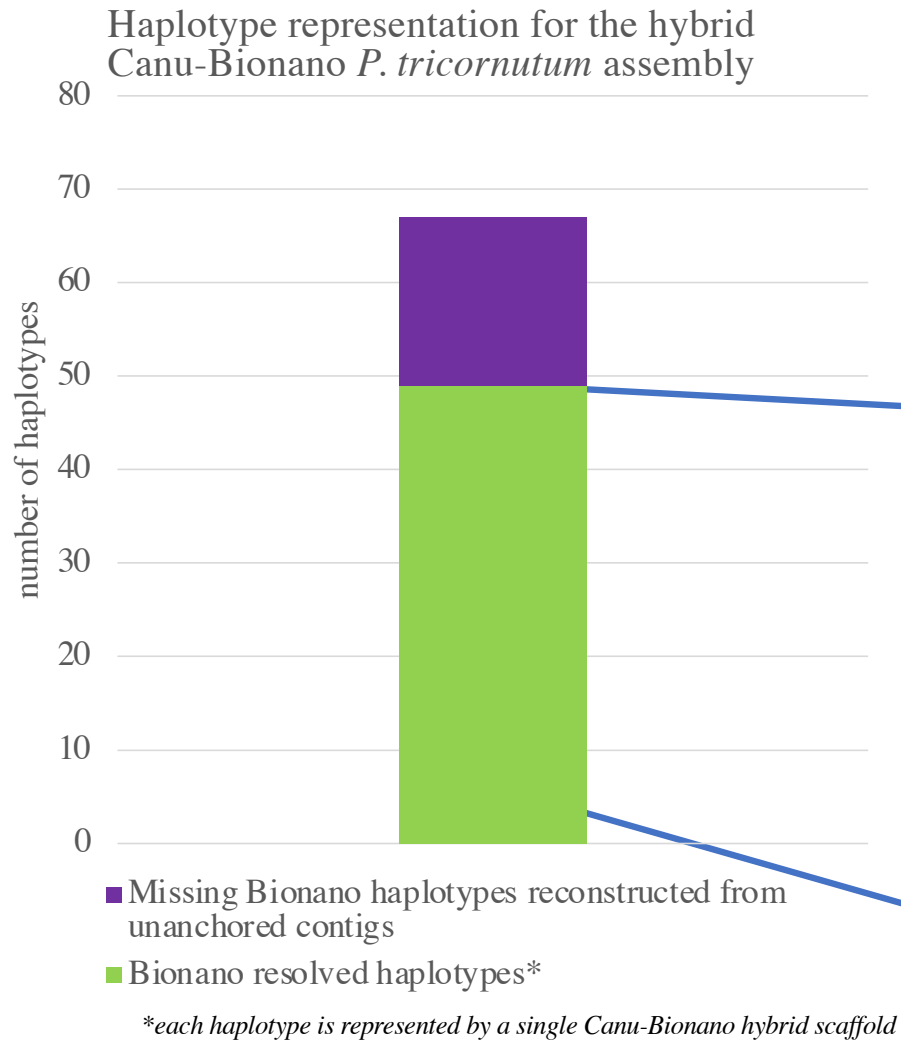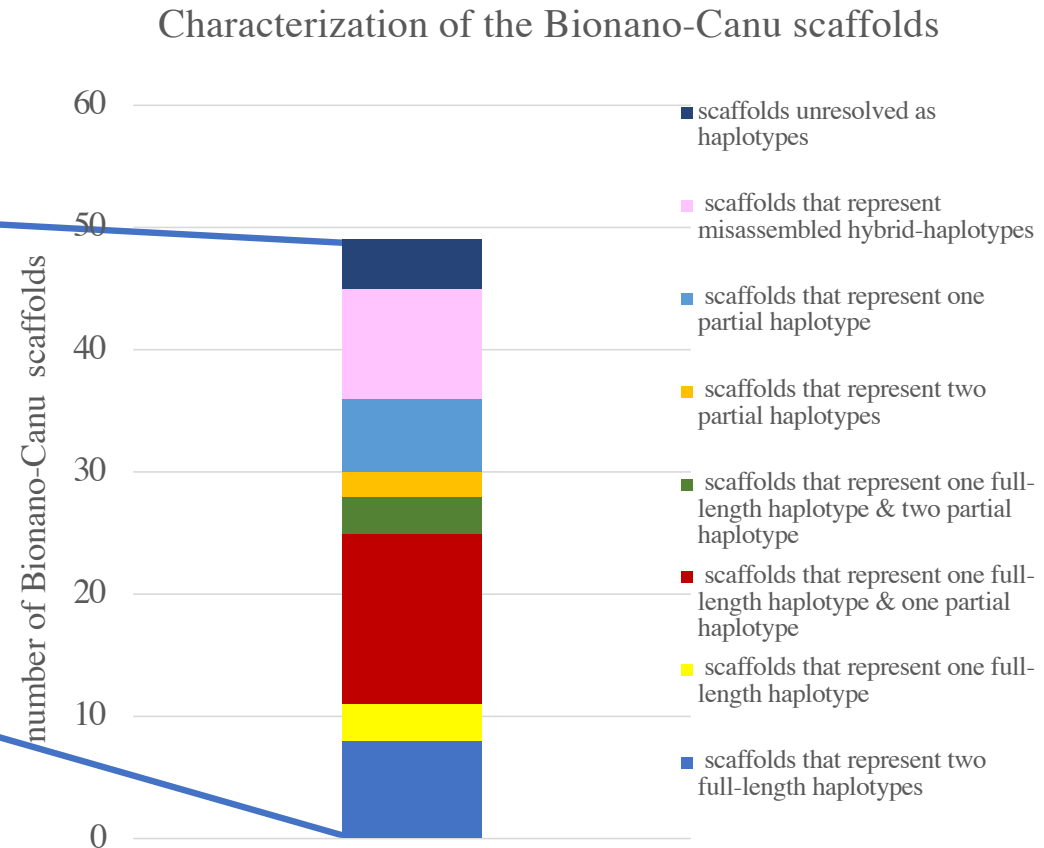

Supplementary Figure 6

# Super-Scaffold\_100002

chr28-chr7-chr13 hybrid  
contigs are erroneously linked  
owing to segmental duplications  
between those chromosome pairs

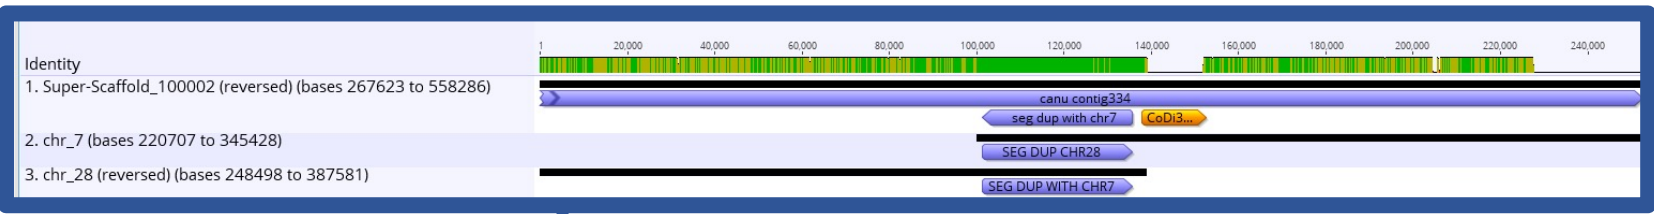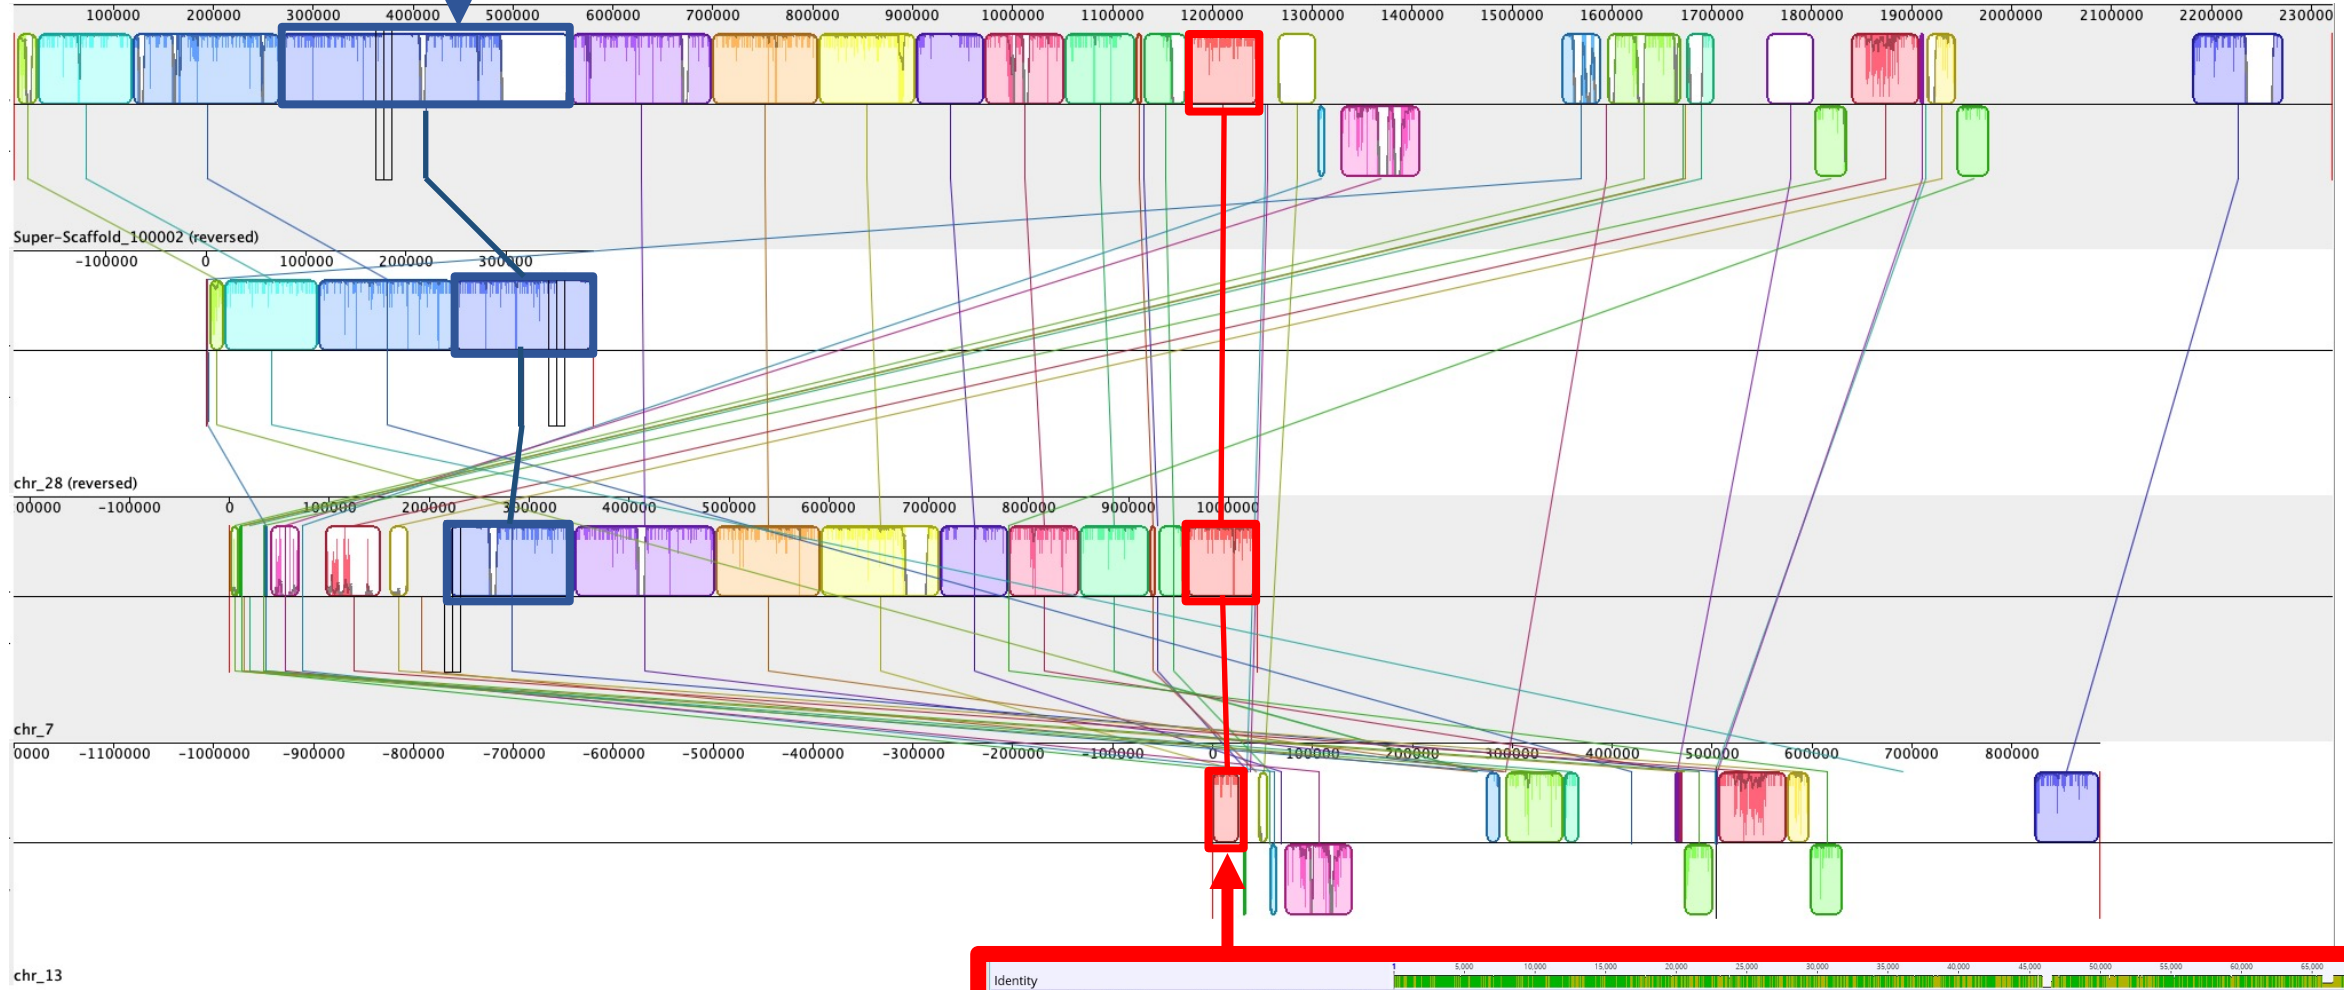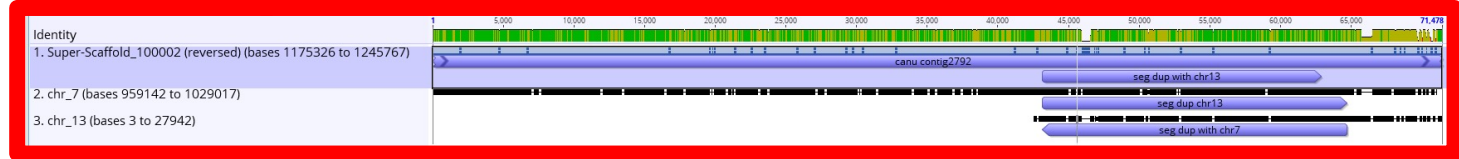

Supplementary Figure 7A

# Super-Scaffold\_100022

chr24-chr29 hybrid  
contigs were erroneously linked owing to segmental duplications  
between those chromosome pairs

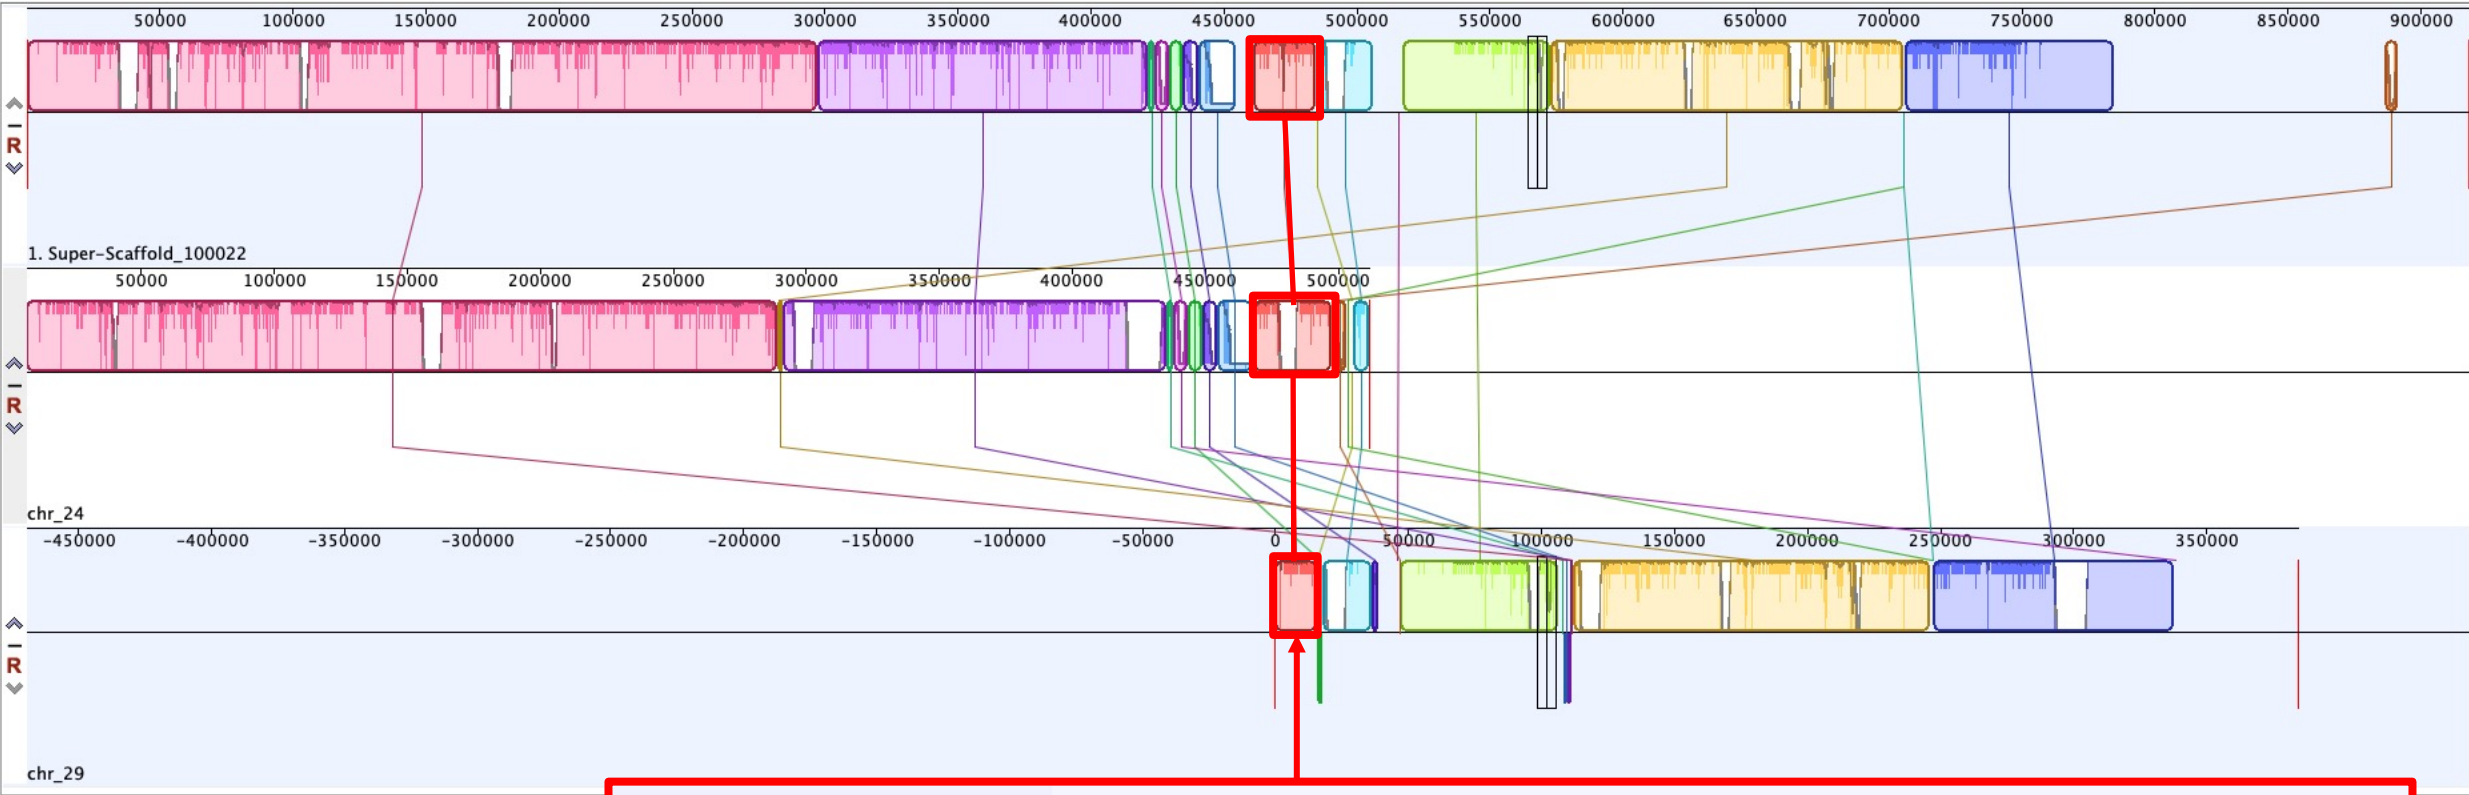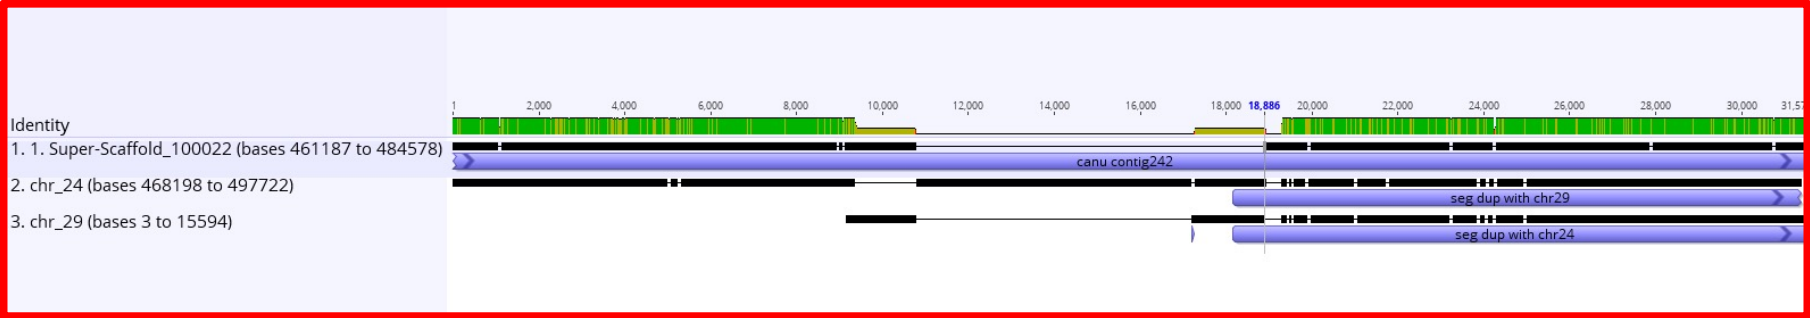

Supplementary Figure 7B



# Super-Scaffold\_100015

chr23-chr19 hybrid  
contigs were erroneously linked owing to CoDi2.1 repetitive elements

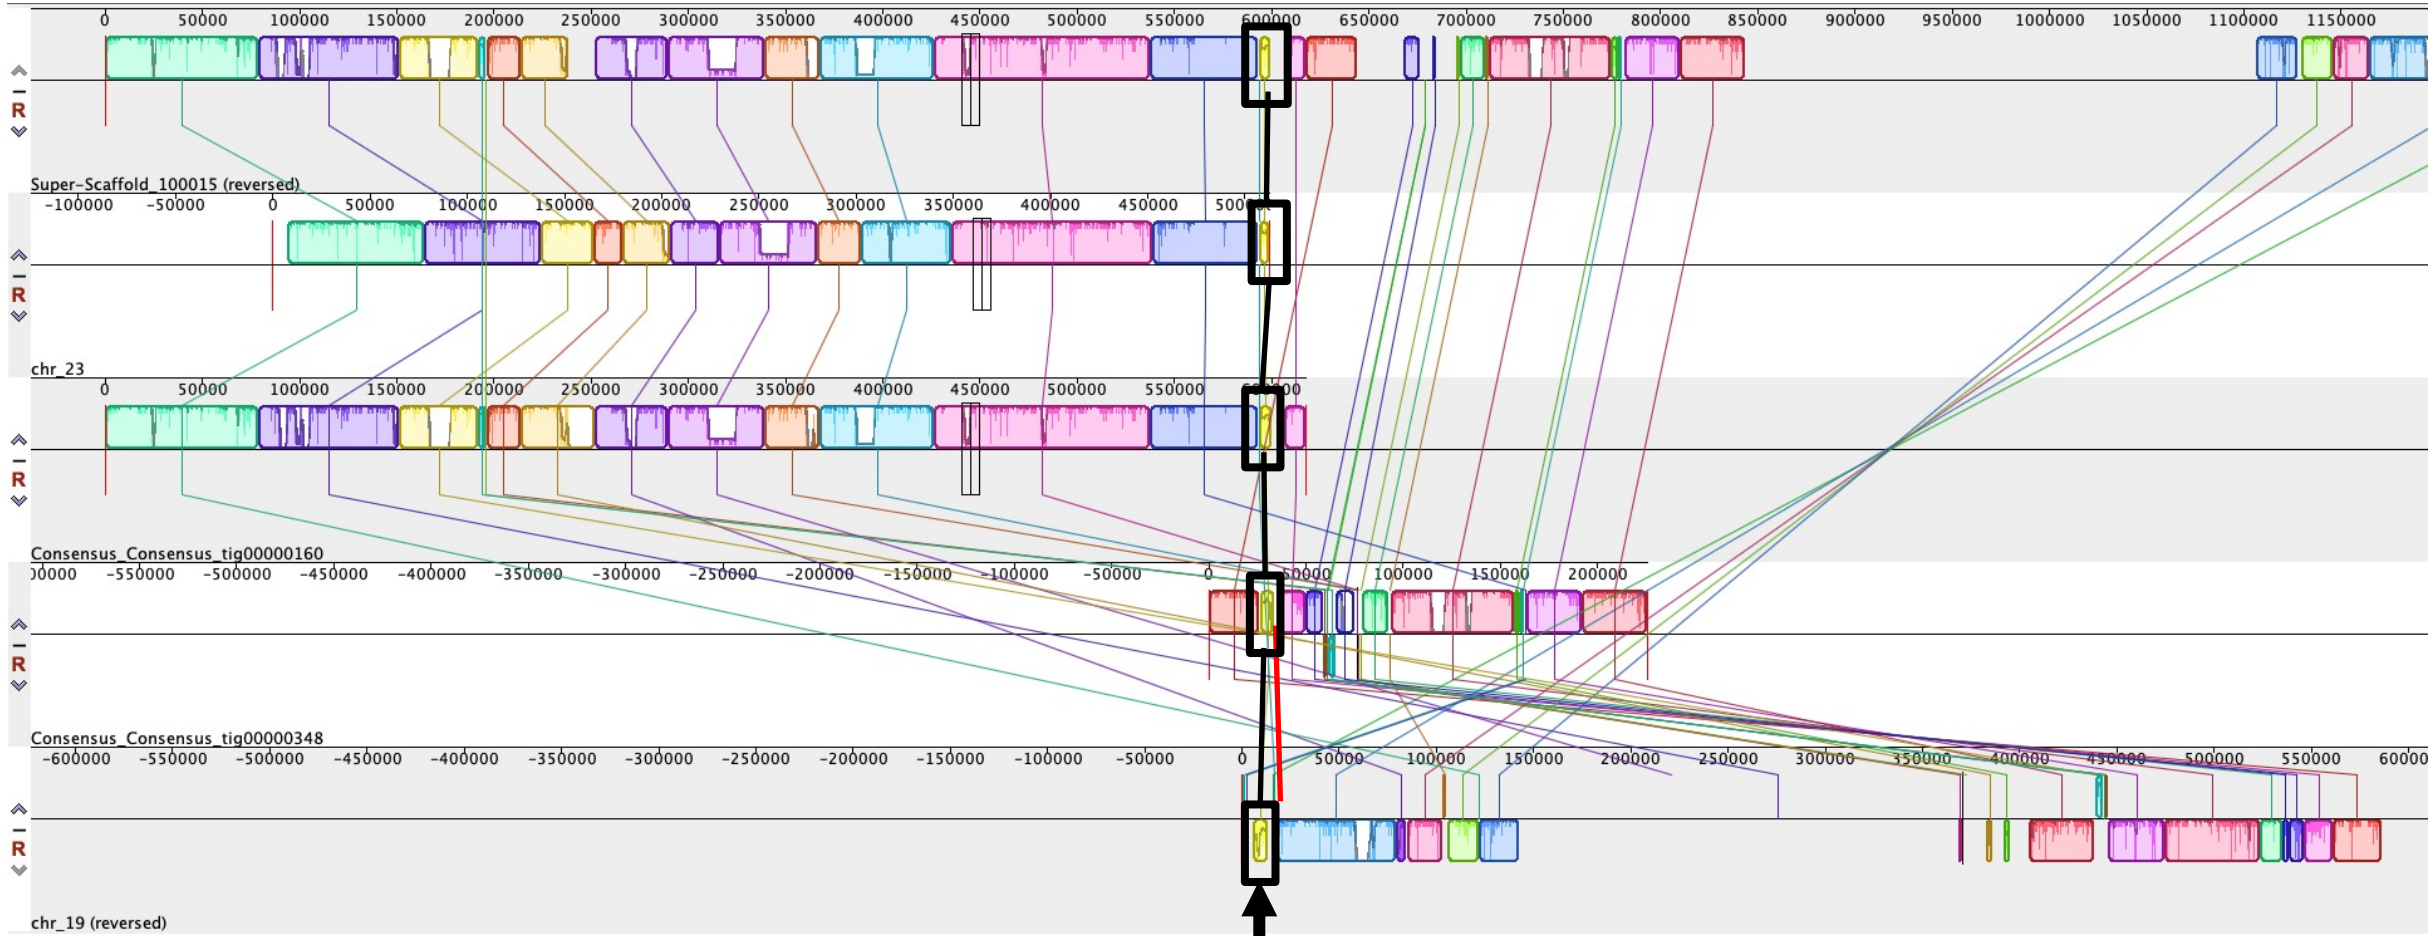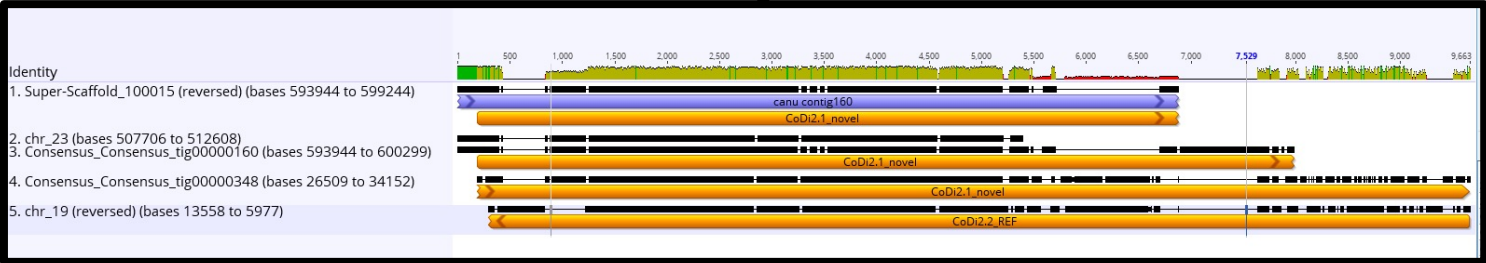

Supplementary Figure 7C

# Super-Scaffold\_100016

chr17—chr27 hybrid

Reference chr17 and chr27 blasted against Super-Scaffold\_100016

|                                     | Description | Max Score | Total Score | Query Cover | E value | Per. Ident | Acc. Len | Accession   |
|-------------------------------------|-------------|-----------|-------------|-------------|---------|------------|----------|-------------|
| <input checked="" type="checkbox"/> | chr17       | 1.904e+05 | 1.224e+06   | 54%         | 0.0     | 98.90%     | 703943   | Query_59208 |
| <input checked="" type="checkbox"/> | chr27       | 95960     | 2.698e+05   | 12%         | 0.0     | 99.28%     | 404298   | Query_59209 |

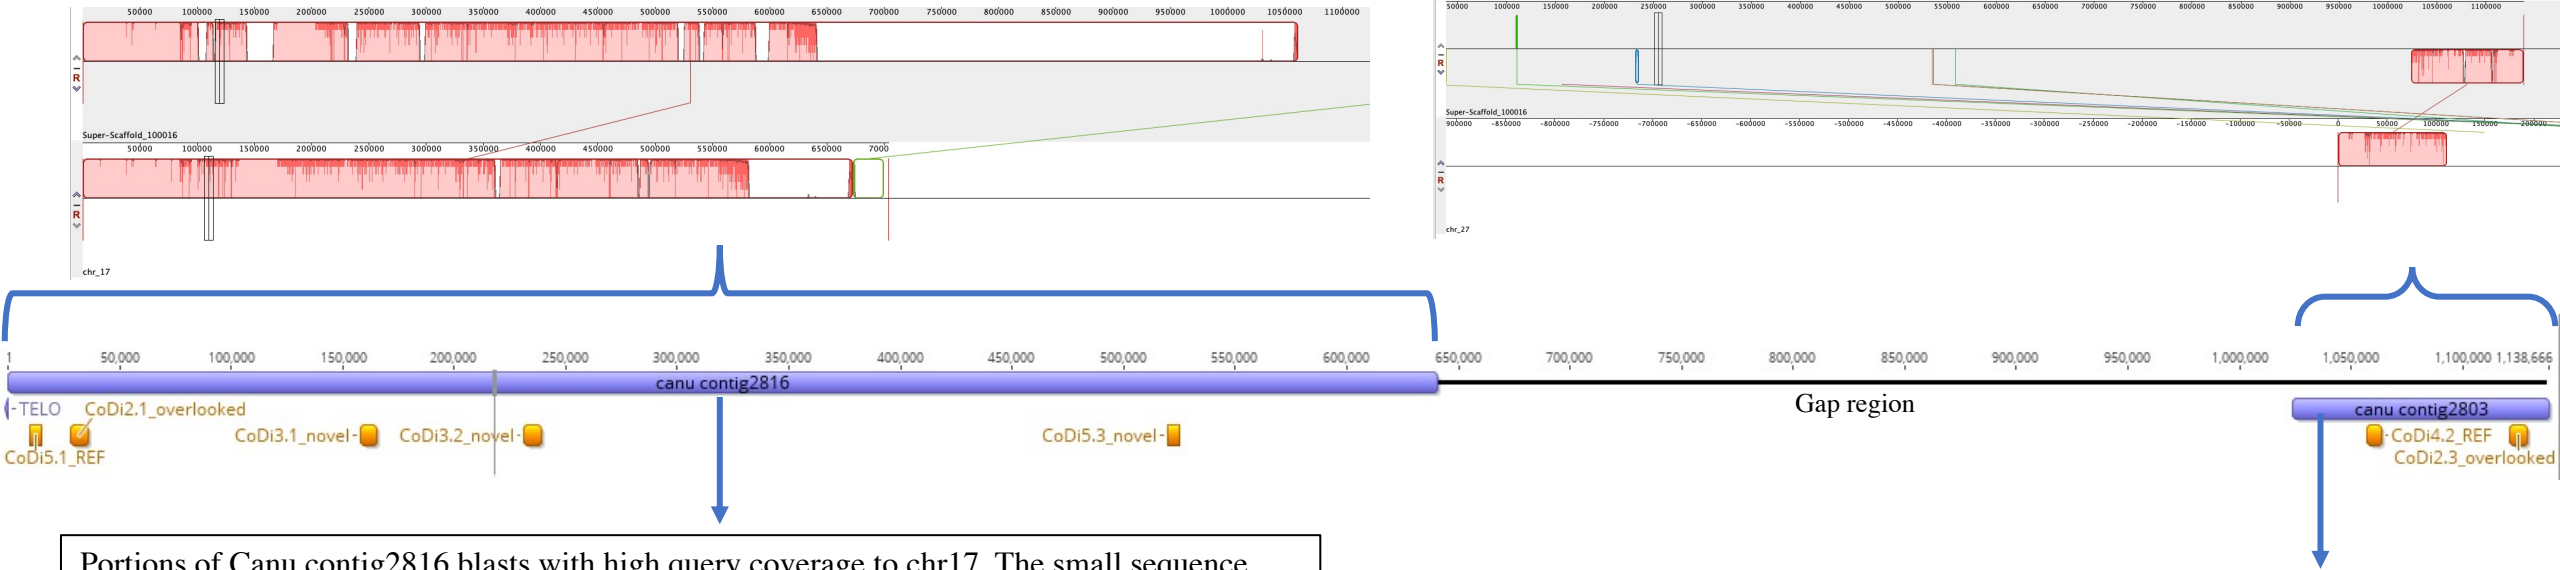

Portions of Canu contig2816 blasts with high query coverage to chr17. The small sequence that aligns to chr27 is part of the CoDi3.2 locus.

|                                     | Description | Max Score | Total Score | Query Cover | E value | Per. Ident | Acc. Len | Accession   |
|-------------------------------------|-------------|-----------|-------------|-------------|---------|------------|----------|-------------|
| <input checked="" type="checkbox"/> | chr17       | 1.904e+05 | 1.207e+06   | 95%         | 0.0     | 98.90%     | 703943   | Query_65036 |
| <input checked="" type="checkbox"/> | chr27       | 4948      | 57095       | 5%          | 0.0     | 98.44%     | 404298   | Query_65037 |

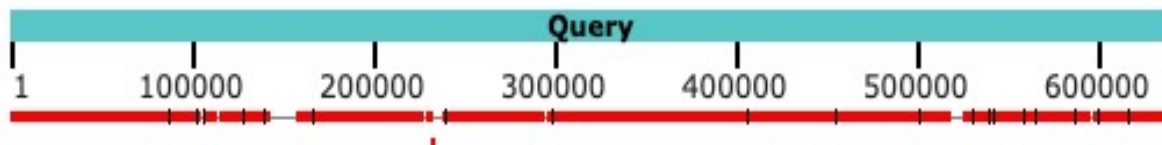

Almost the entirety of Canu contig2803 blasts strongly to chr27

|                                     | Description | Max Score | Total Score | Query Cover | E value | Per. Ident | Acc. Len | Accession   |
|-------------------------------------|-------------|-----------|-------------|-------------|---------|------------|----------|-------------|
| <input checked="" type="checkbox"/> | chr27       | 95960     | 2.127e+05   | 97%         | 0.0     | 99.28%     | 404298   | Query_47591 |
| <input checked="" type="checkbox"/> | chr17       | 2302      | 16455       | 11%         | 0.0     | 95.86%     | 703943   | Query_47590 |

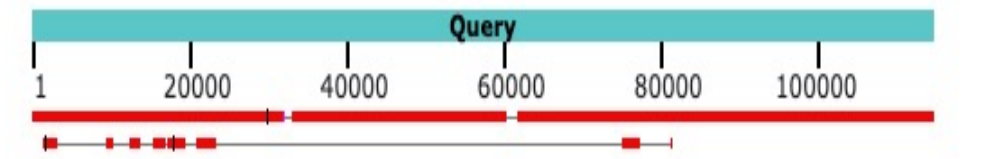

# Super-Scaffold\_100007

chr7 — chr22 hybrid

Reference chr22 and chr7 blasted against Super-Scaffold\_100007

| Description | Max Score | Total Score | Query Cover | E value | Per. Ident | Acc. Len | Accession  |
|-------------|-----------|-------------|-------------|---------|------------|----------|------------|
| chr22       | 1.510e+05 | 1.114e+06   | 29%         | 0.0     | 99.41%     | 591336   | Query_3346 |
| chr7        | 1.102e+05 | 6.799e+05   | 18%         | 0.0     | 99.58%     | 1029019  | Query_3347 |

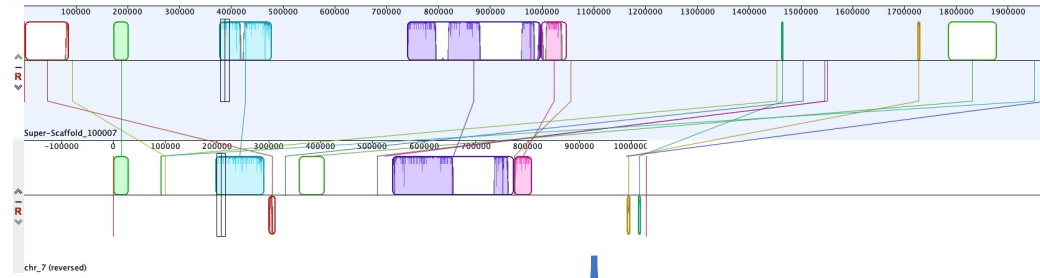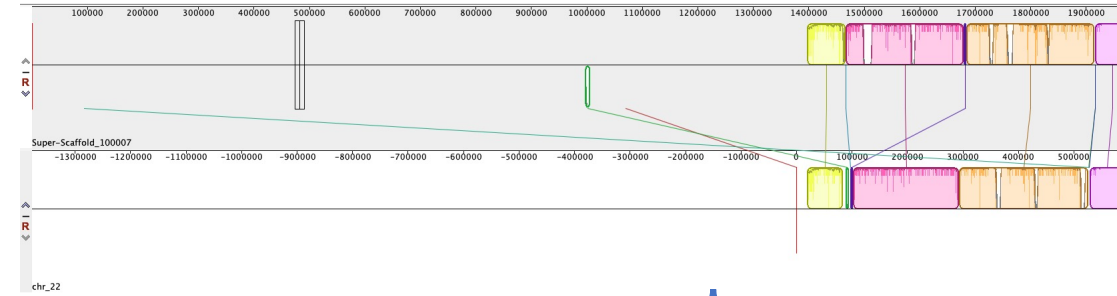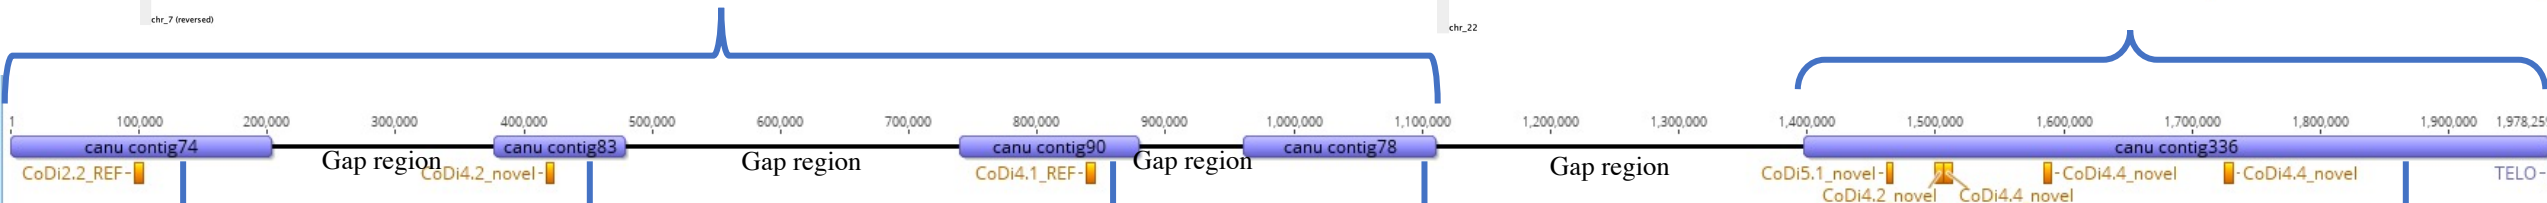

| Description | Total Score | Query Cover | Per. Ident | Acc. Len |
|-------------|-------------|-------------|------------|----------|
| chr7        | 98817       | 25%         | 99.99%     | 1029019  |
| chr22       | 21159       | 6%          | 95.28%     | 591336   |

| Description | Total Score | Query Cover | Per. Ident | Acc. Len |
|-------------|-------------|-------------|------------|----------|
| chr7        | 1.731e+05   | 95%         | 99.42%     | 1029019  |
| chr22       | 1169        | 2%          | 76.06%     | 591336   |

| Description | Total Score | Query Cover | Per. Ident | Acc. Len |
|-------------|-------------|-------------|------------|----------|
| chr7        | 1.289e+05   | 44%         | 98.87%     | 1029019  |
| chr22       | 1703        | 0%          | 89.62%     | 591336   |

| Description | Total Score | Query Cover | Per. Ident | Acc. Len |
|-------------|-------------|-------------|------------|----------|
| chr7        | 2.370e+05   | 91%         | 99.58%     | 1029019  |
| chr22       | 26125       | 10%         | 95.30%     | 591336   |

Almost the entirety of Canu contig336 is homologous to chr22.

| Description | Max Score | Total Score | Query Cover | E value | Per. Ident | Acc. Len | Accession   |
|-------------|-----------|-------------|-------------|---------|------------|----------|-------------|
| chr22       | 1.510e+05 | 1.064e+06   | 94%         | 0.0     | 99.41%     | 591336   | Query_30794 |
| chr7        | 7101      | 42081       | 5%          | 0.0     | 93.55%     | 1029019  | Query_30795 |

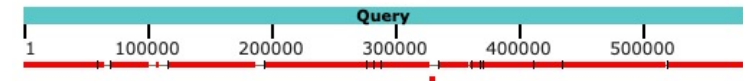

# Super-Scaffold\_100014

## chr27—chr17 hybrid

Reference chr27 and chr17 blasted against Super-Scaffold\_100014

|   | Description           | Total Score | Query Cover | E value | Per. Ident | Acc. Len |
|---|-----------------------|-------------|-------------|---------|------------|----------|
| ✓ | <a href="#">chr27</a> | 7.802e+05   | 37%         | 0.0     | 99.03%     | 404298   |
| ✓ | <a href="#">chr17</a> | 6.373e+05   | 28%         | 0.0     | 99.42%     | 703943   |

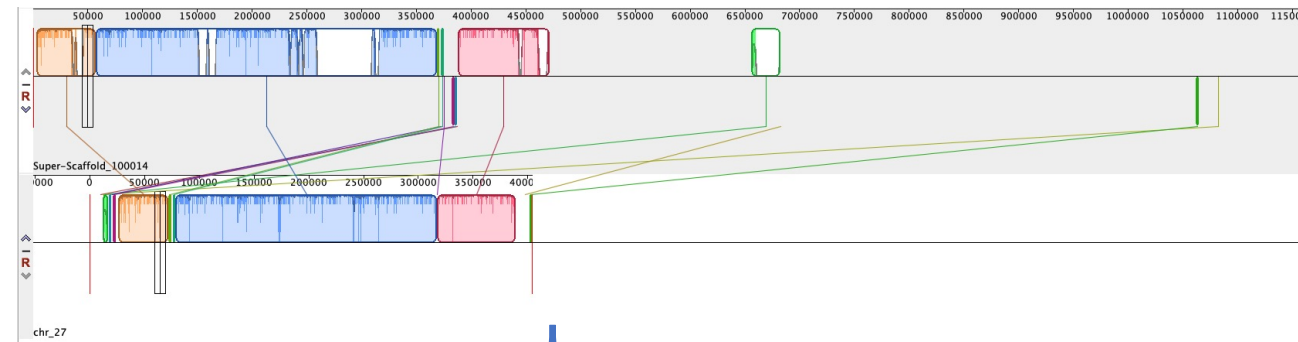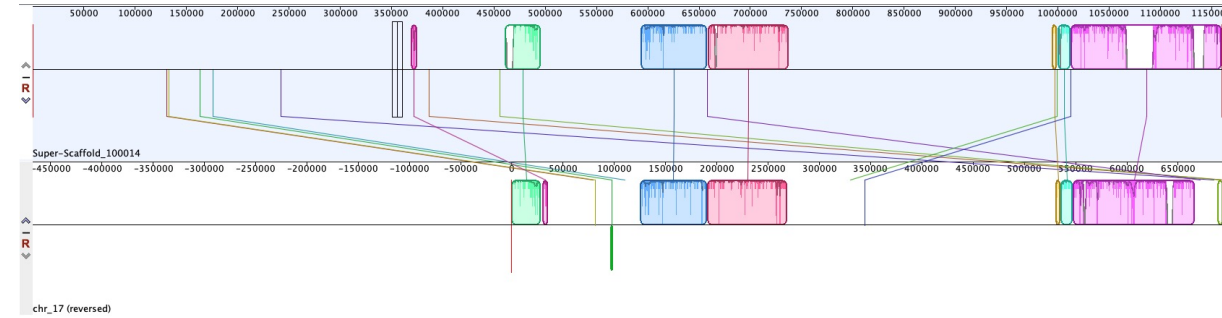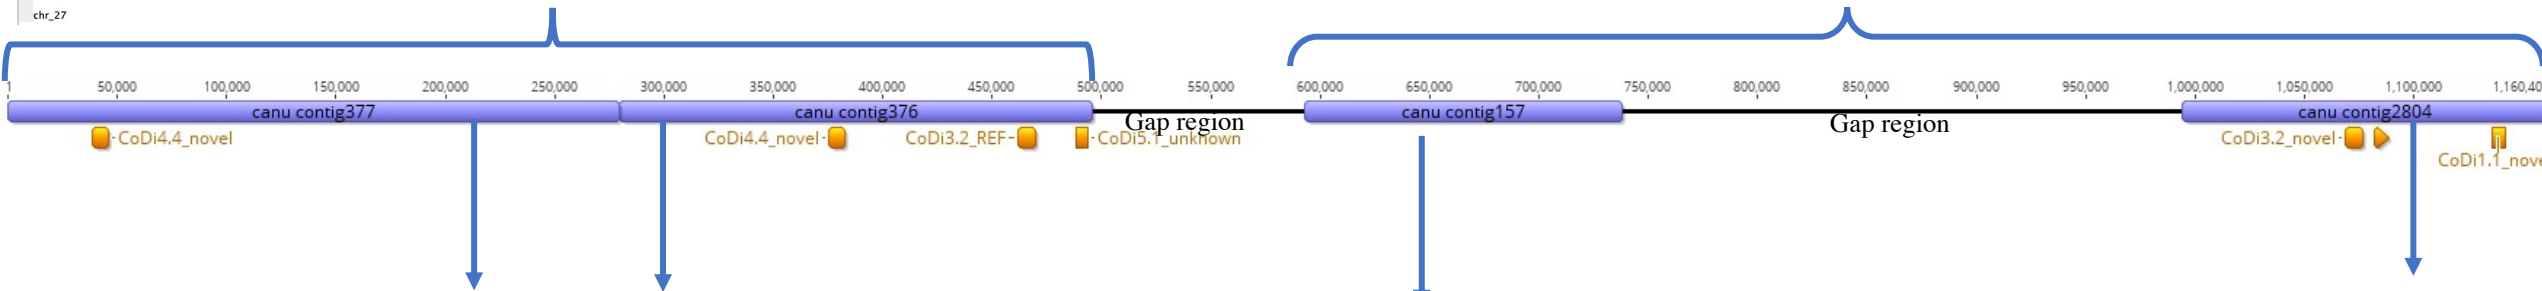

Canu contig377 and contig 376 have 99% identity to chr27 with a qcov against chr2 of 88% and 80%, respectively. Contig377 has a qcov to chr17 of 3% while the qcov to chr17 for contig 376 is 23%.

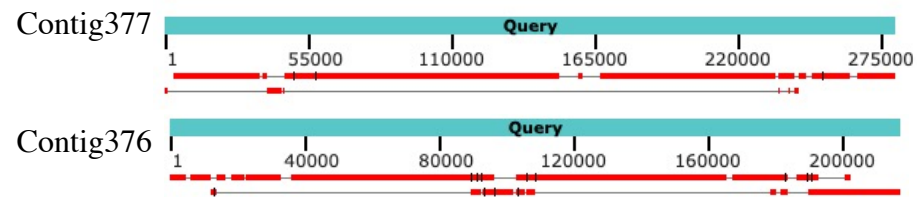

Canu contig157 blasts to chr17 along its entire length.

| Description           | Total Score | Query Cover | Per. Ident | Acc. Len |
|-----------------------|-------------|-------------|------------|----------|
| <a href="#">chr17</a> | 2.716e+05   | 98%         | 99.42%     | 703943   |
| <a href="#">chr27</a> | 3552        | 2%          | 82.54%     | 404298   |

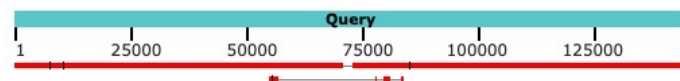

Canu contig2804 blasts to chr17 along the majority of its length.

| Description           | Total Score | Query Cover | Per. Ident | Acc. Len |
|-----------------------|-------------|-------------|------------|----------|
| <a href="#">chr17</a> | 2.376e+05   | 80%         | 97.50%     | 703943   |
| <a href="#">chr27</a> | 20693       | 5%          | 99.14%     | 404298   |

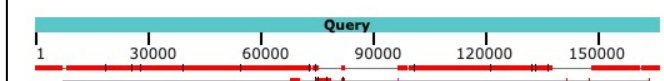

# Super-Scaffold\_100006

chr15—chr4 hybrid

Reference chr4 and chr15 blasted against Super-Scaffold\_100006

|                                     | Description | Max Score | Total Score | Query Cover | E value | Per. Ident | Acc. Len |
|-------------------------------------|-------------|-----------|-------------|-------------|---------|------------|----------|
| <input checked="" type="checkbox"/> | chr4        | 4.301e+05 | 2.358e+06   | 53%         | 0.0     | 99.34%     | 1360148  |
| <input checked="" type="checkbox"/> | chr15       | 2.161e+05 | 1.316e+06   | 30%         | 0.0     | 99.15%     | 814910   |

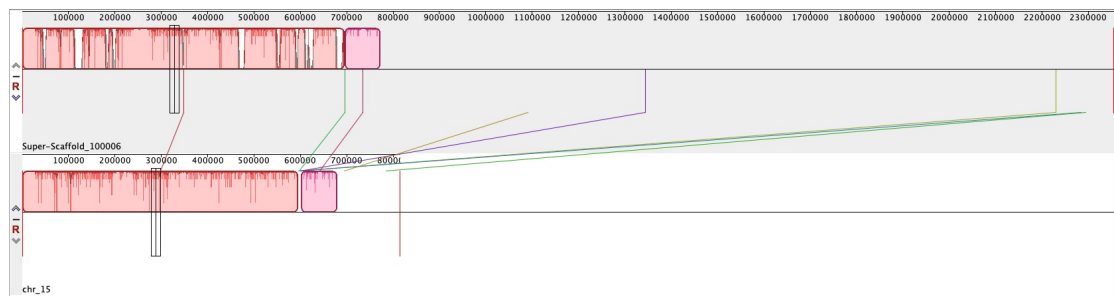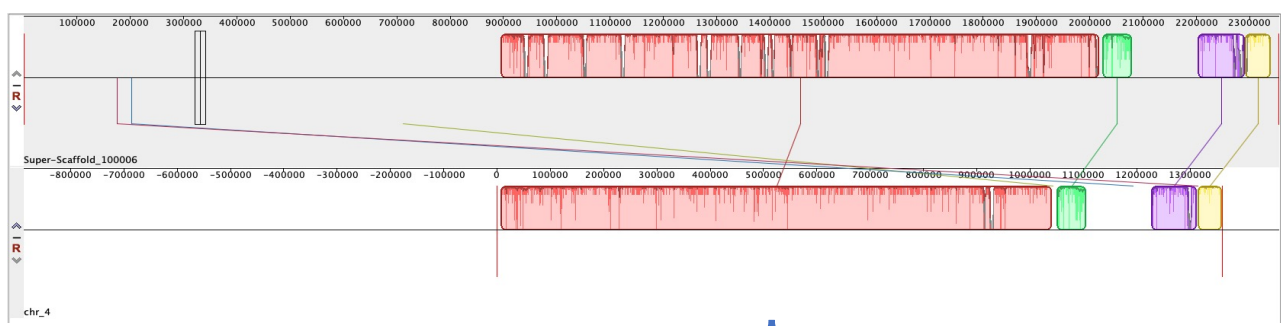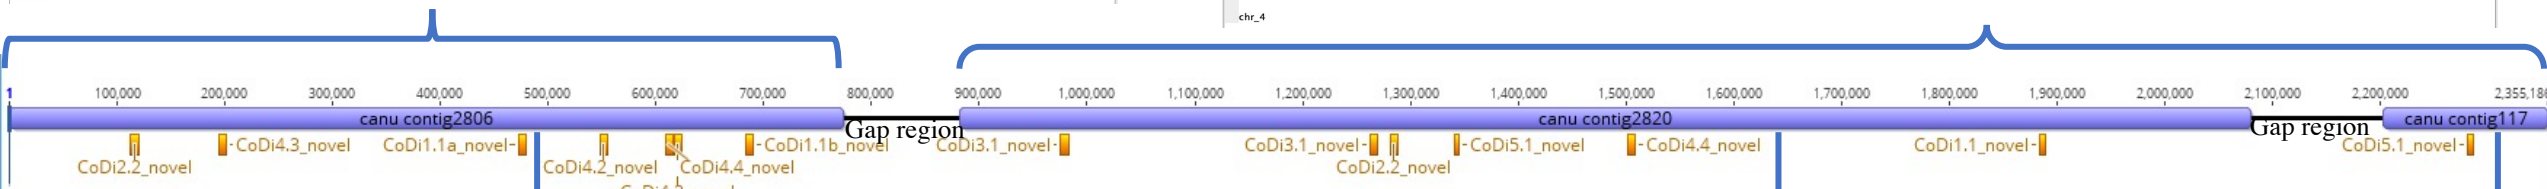

Almost the entirety of Canu contig2806 blasts to chr15 with low query coverage to chr4.

|                                     | Description | Max Score | Total Score | Query Cover | Per. Ident | Acc. Len |
|-------------------------------------|-------------|-----------|-------------|-------------|------------|----------|
| <input checked="" type="checkbox"/> | chr15       | 2.161e+05 | 1.251e+06   | 87%         | 99.15%     | 814910   |
| <input checked="" type="checkbox"/> | chr4        | 2892      | 39615       | 3%          | 80.67%     | 1360148  |

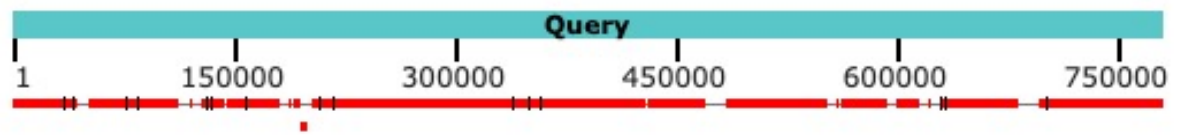

Almost the entirety of Canu contig2820 blasts to chr4 with low query coverage to chr15.

|                                     | Description | Total Score | Query Cover | Per. Ident | Acc. Len |
|-------------------------------------|-------------|-------------|-------------|------------|----------|
| <input checked="" type="checkbox"/> | chr4        | 2.054e+06   | 92%         | 99.34%     | 1360148  |
| <input checked="" type="checkbox"/> | chr15       | 44505       | 1%          | 82.47%     | 814910   |

Almost the entirety of Canu contig117 blasts to chr4 with low query coverage to chr15.

|                                     | Description | Total Score | Query Cover | Per. Ident | Acc. Len |
|-------------------------------------|-------------|-------------|-------------|------------|----------|
| <input checked="" type="checkbox"/> | chr4        | 2.645e+05   | 87%         | 98.96%     | 1360148  |
| <input checked="" type="checkbox"/> | chr15       | 20733       | 7%          | 82.79%     | 814910   |

# Super-Scaffold\_100008

chr13—chr18 hybrid

Reference chr13 and chr18 blasted against Super-Scaffold\_100008

| Description                               | Common Name | Max Score | Total Score | Query Cover | E value | Per. Ident | Acc. Len | Accession   |
|-------------------------------------------|-------------|-----------|-------------|-------------|---------|------------|----------|-------------|
| <input checked="" type="checkbox"/> chr13 |             | 2.100e+05 | 1.545e+06   | 50%         | 0.0     | 99.33%     | 887524   | Query_10986 |
| <input checked="" type="checkbox"/> chr18 |             | 69653     | 1.037e+06   | 33%         | 0.0     | 98.98%     | 702471   | Query_10987 |

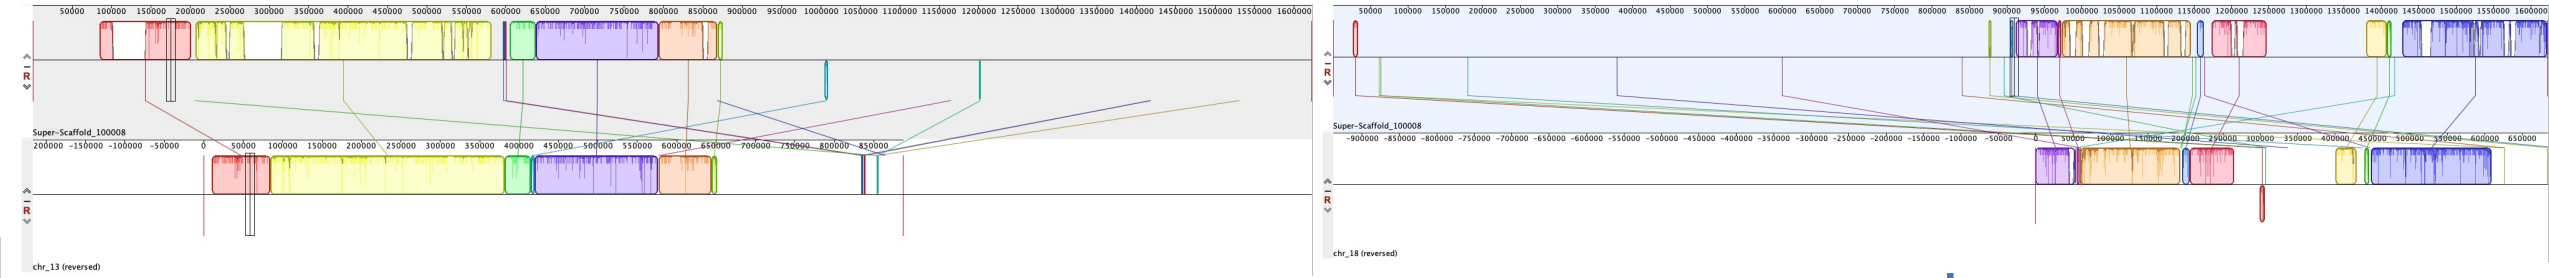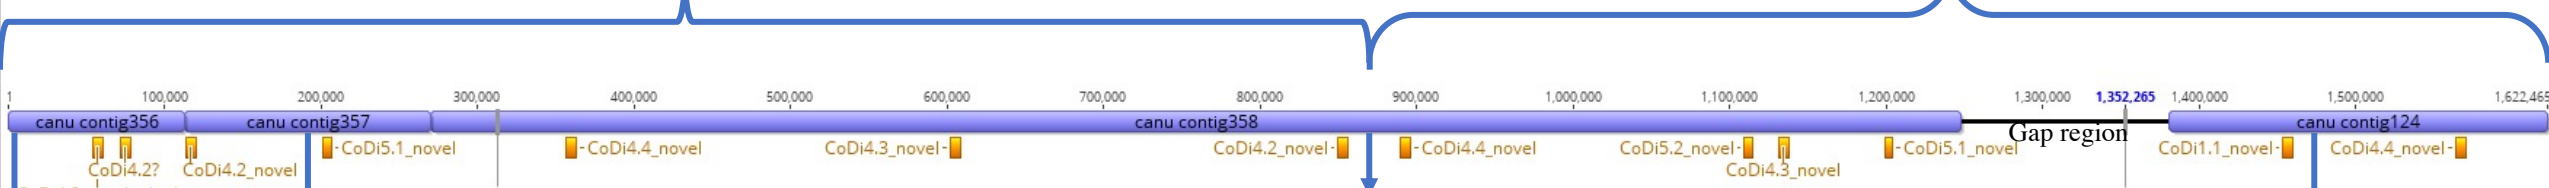

Canu contig357 blasts to chr13 along almost its entire length

| Description                                 | Max Score | Total Score | Query Cover | E value | Per. Ident | Acc. Len |
|---------------------------------------------|-----------|-------------|-------------|---------|------------|----------|
| <input checked="" type="checkbox"/> chr13Rx | 1.340e+05 | 2.780e+05   | 92%         | 0.0     | 99.07%     | 887524   |
| <input checked="" type="checkbox"/> chr18Rx | 1046      | 2188        | 1%          | 0.0     | 91.76%     | 702471   |

Portions of Canu contig358 blast to chr13 and chr18. Raw read mapping does not support contig358 as a misassembled contig.

| Description                               | Max Score | Total Score | Query Cover | E value | Per. Ident | Acc. Len | Accession   |
|-------------------------------------------|-----------|-------------|-------------|---------|------------|----------|-------------|
| <input checked="" type="checkbox"/> chr13 | 2.100e+05 | 1.159e+06   | 62%         | 0.0     | 99.33%     | 887524   | Query_59720 |
| <input checked="" type="checkbox"/> chr18 | 69653     | 5.924e+05   | 31%         | 0.0     | 98.98%     | 702471   | Query_59721 |

The majority of Canu contig124 blasts strongly to chr18 and aligns to only to the CoDi4.4 locus of chr13

| Description                               | Common Name | Max Score | Total Score | Query Cover | E value | Per. Ident | Acc. Len | Accession |
|-------------------------------------------|-------------|-----------|-------------|-------------|---------|------------|----------|-----------|
| <input checked="" type="checkbox"/> chr18 |             | 58637     | 4.145e+05   | 87%         | 0.0     | 98.80%     | 702471   | Query_759 |
| <input checked="" type="checkbox"/> chr13 |             | 9132      | 18155       | 4%          | 0.0     | 93.86%     | 887524   | Query_758 |

Canu contig356 strongly identifies a portion of the contig to chr13 with the rest of the contig not well resolved to another reference chromosome

| Description                                 | Max Score | Total Score | Query Cover | E value | Per. Ident | Acc. Len |
|---------------------------------------------|-----------|-------------|-------------|---------|------------|----------|
| <input checked="" type="checkbox"/> chr13Rx | 49358     | 89450       | 45%         | 0.0     | 98.51%     | 887524   |
| <input checked="" type="checkbox"/> chr18Rx | 8257      | 28322       | 14%         | 0.0     | 98.47%     | 702471   |

# Super-Scaffold\_100005

chr2—chr12 hybrid

Reference chr2 and chr12 blasted against Super-Scaffold\_100005

|                                     | Description | Max Score | Total Score | Query Cover | E value | Per. Ident | Acc. Len | Accession   |
|-------------------------------------|-------------|-----------|-------------|-------------|---------|------------|----------|-------------|
| <input checked="" type="checkbox"/> | chr2        | 2.607e+05 | 2.718e+06   | 58%         | 0.0     | 99.53%     | 1497954  | Query_29820 |
| <input checked="" type="checkbox"/> | chr12       | 2.274e+05 | 1.654e+06   | 32%         | 0.0     | 99.37%     | 901853   | Query_29821 |

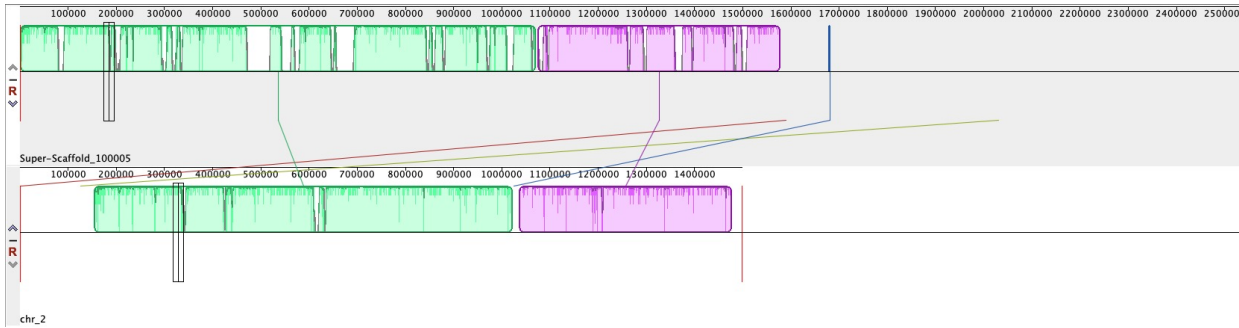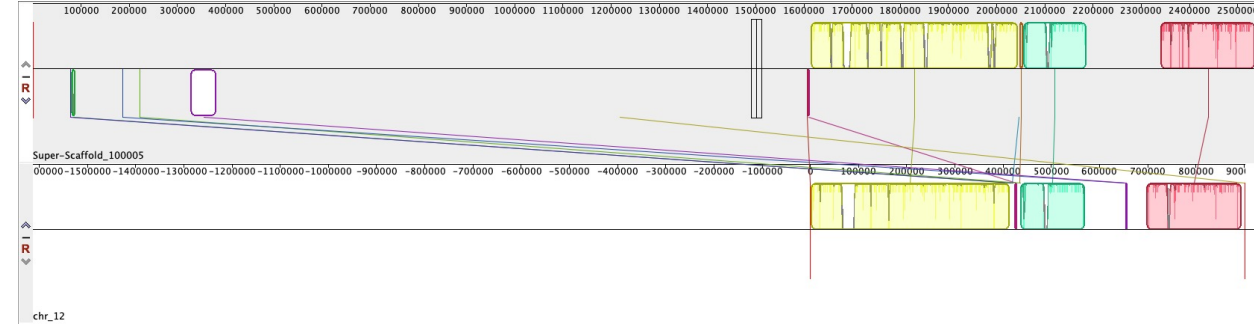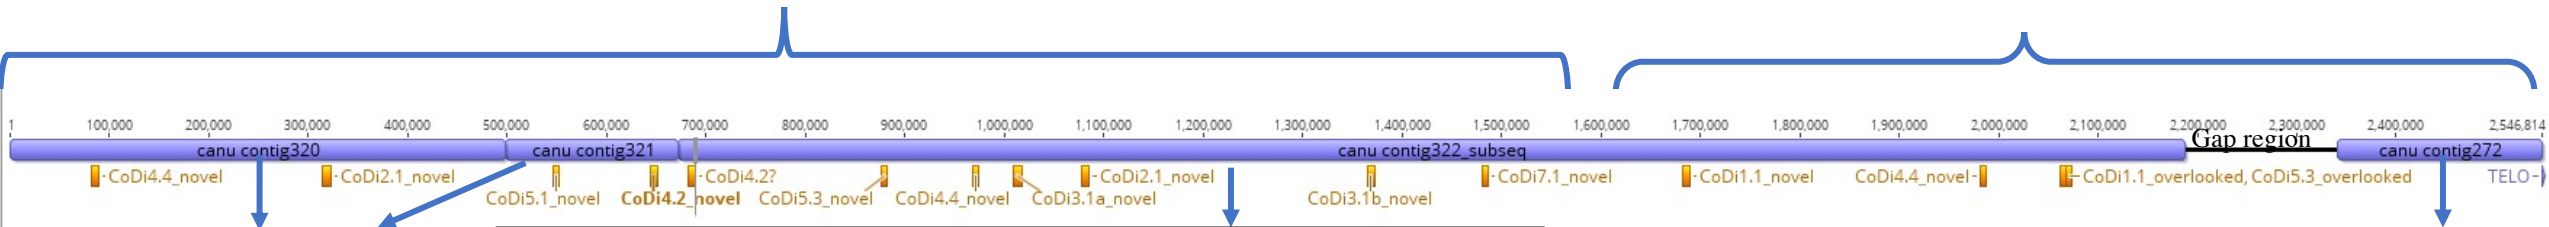

Canu contig320 and contig321 have 99% identity to chr2 with a qcov against chr2 of 91% and 84%, respectively. Both contigs have <10% qcov to chr12

Portions of Canu contig322 blast to chr2 and chr12 but raw read mapping does not indicate contig322 as a misassembled contig and does not support splitting this contig.

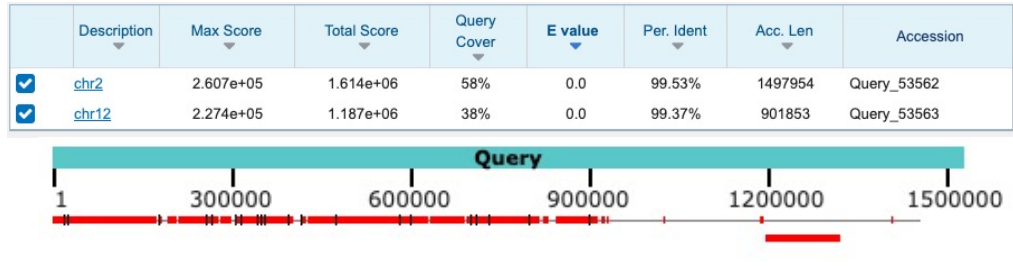

Canu contig272 does not align to chr2 but does show strong identity along its entire length to chr12.

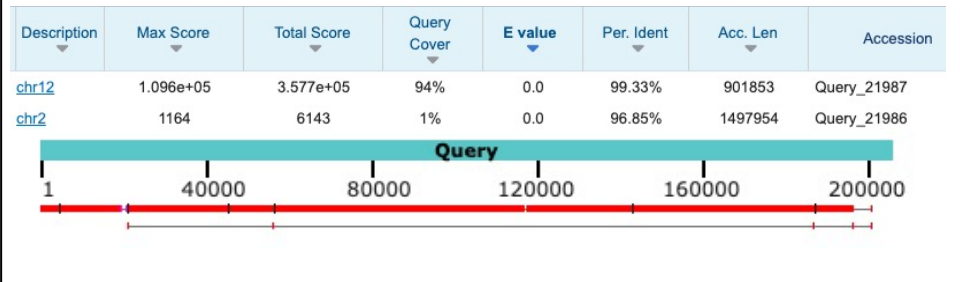

# Reference consensus is a mixture of haplotypes

|                |       |                                                              |
|----------------|-------|--------------------------------------------------------------|
| haplotype 1    | tig94 | ATACAATTCTTGTATTTCGGATAGAGAGAGCGAAAGTGCCGGATACGCTTTCGTTTTTCG |
| haplotype 2    | tig92 | ATACAATTCTTGTCTTCGGATAGAGAGAGACGAAAGTGCCGGATACGCTTTCGATTTTCG |
| NCBI reference | chr_3 | ATACAATTCTTGTATTTCGGATAGAGAGAGCGAAAGTGCCGGATACGCTTTCGTTTTTCG |
|                |       | ***** ** *****                                               |

## Example 1

|       |                                                             |
|-------|-------------------------------------------------------------|
| tig94 | AAACCCCAATGGACAACGGGTGTAAT---TGTATGTATGTCTGTATGTGTGCGTTCCT  |
| tig92 | AAACCCCAAGGGACAACGGGTGTAATTGTATGTATGTATGTATGTATGTGTGCGTTCCT |
| chr_3 | AAACCCCAAGGGACAACGGGTGTAATTGTATGTATGTATGTATGTATGTGTGCGTTCCT |
|       | ***** ** *****                                              |

|       |                                                              |
|-------|--------------------------------------------------------------|
| tig94 | GTGTACGAAAGGGACCGTATTCCTGCGTTGCCACTCTAGCGGAAATATTGGTAACGGCA  |
| tig92 | GTGTACGAAAGGGACCGTATTCCTGCGTTGCCAACTCTAGCGGAACTATTGGTAACGGCA |
| chr_3 | GTGTACGAAAGGGACCGTATTCCTGCGTTGCCAACTCTAGCGGAACTATTGGTAACGGCA |
|       | ***** ** *****                                               |

|       |                                                             |
|-------|-------------------------------------------------------------|
| tig94 | ACGTACCCTCCCGTACTAACGTCGCGTGGATCGTCTCCTGCCGTGGCGAGAGCGCGTGC |
| tig92 | ACGTACCCTCCCGTACTAACGTCGCGTGGATCGTCTCCTGCCGTGGCGAGAGCGCGTGC |
| chr_3 | ACGTACCCTCCCGTACTAACGTCGCGTGGATCGTCTCCTGCCGTGGCGAGAGCGCGTGC |
|       | ***** ** *****                                              |

Reads consistently contain all snps



# Reference consensus is a mixture of haplotypes

IGV visual multiple alignment of Illumina reads –example 1

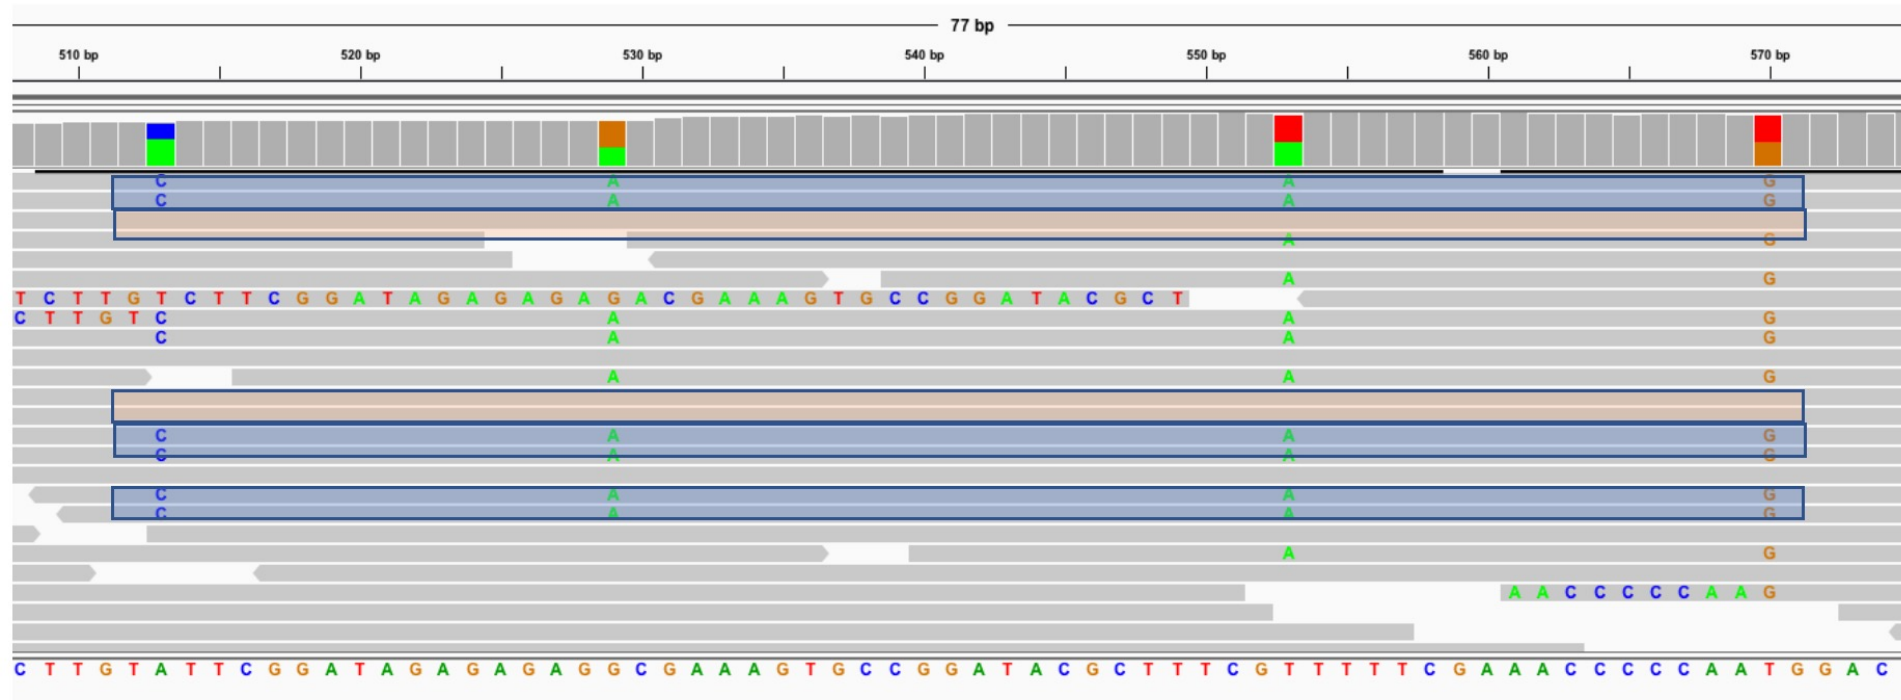

32 reads with haplotype 1

30 reads with haplotype 2

A

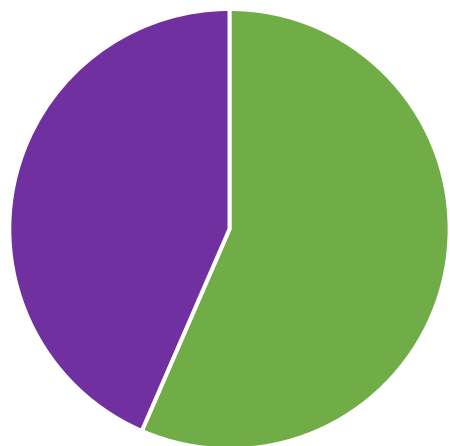

reference overlooked

B

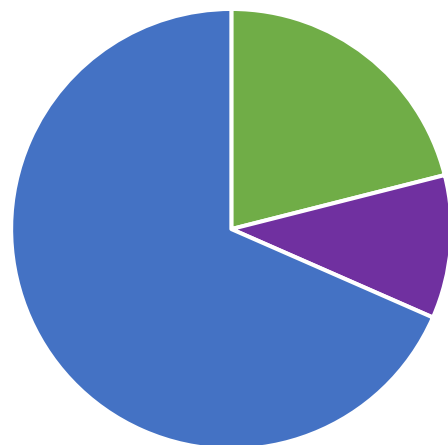

reference overlooked novel

C

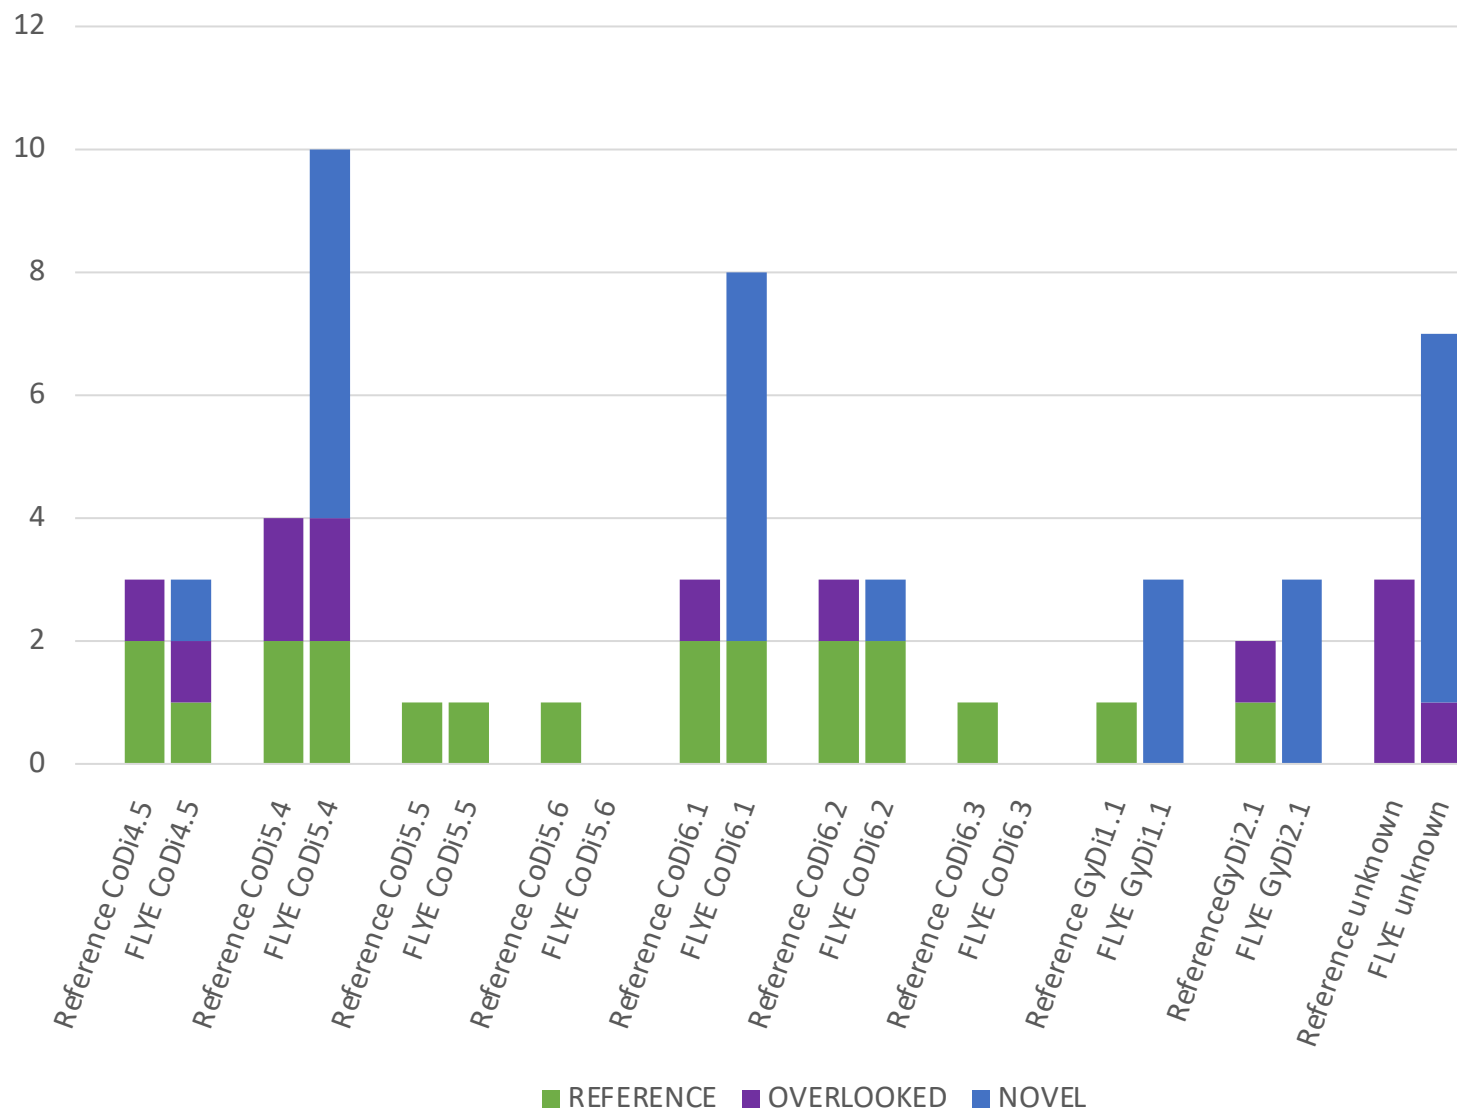

REFERENCE OVERLOOKED NOVEL
